# Supplementary material for: Preparation of a potassium chloride bridged thorium phosphinidiide complex and its reactivity towards small organic molecules
Source: Royal Society of Chemistry journal article supplement (doi:10.1039/c9nj02269d), 2019-01-01
Supplement: c9nj02269d1.pdf [file c9nj02269d1.pdf]

*Supporting Information for*

# Preparation of a potassium chloride bridged thorium phosphinidide complex and its reactivity towards small organic molecules

Yongsong Wang,<sup>a</sup> Congcong Zhang,<sup>a</sup> Guofu Zi,<sup>\*a</sup> Wanjian Ding,<sup>\*a</sup> and Marc D. Walter<sup>\*b</sup>

<sup>a</sup>Department of Chemistry, Beijing Normal University, Beijing 100875, China

<sup>b</sup>Institut für Anorganische und Analytische Chemie, Technische Universität Braunschweig, Hagenring  
30, 38106 Braunschweig, Germany

## Table of contents

|                             |    |
|-----------------------------|----|
| 1. Figures                  | S2 |
| 2. Crystallographic details | S4 |
| 3. Computational details    | S8 |

## 1. Figures

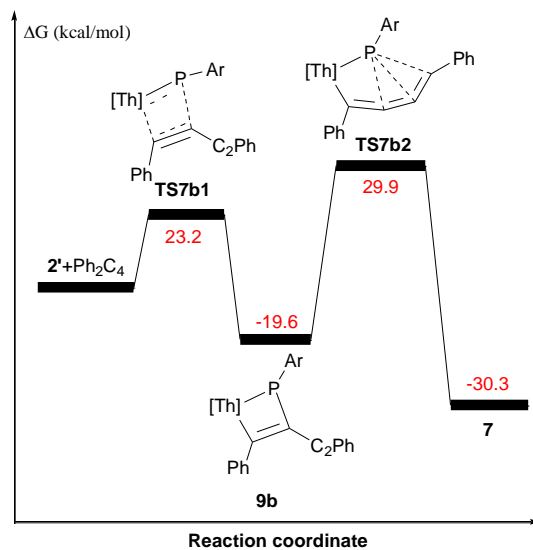

**Figure S1.** Energy profile (kcal/mol) for the reaction of  $2 + \text{Ph}_2\text{C}_4$  (computed at  $T = 298$  K). [Th] =  $[\eta^5\text{-}1,3\text{-(Me}_3\text{C)}_2\text{C}_5\text{H}_3]_2\text{Th}$ . Ar = 2,4,6- $t$ -Pr $_3$ C $_6$ H $_2$ .

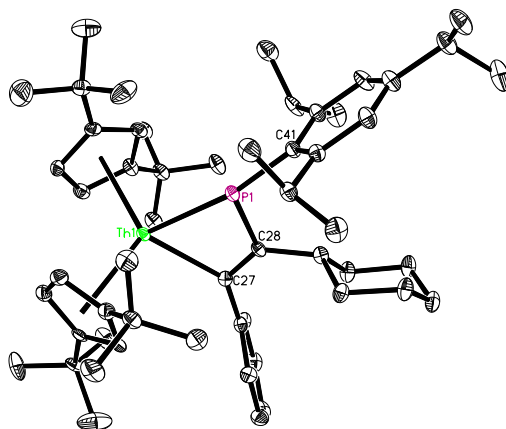

**Figure S2** Molecular structure of **5a** (thermal ellipsoids drawn at the 35% probability level).

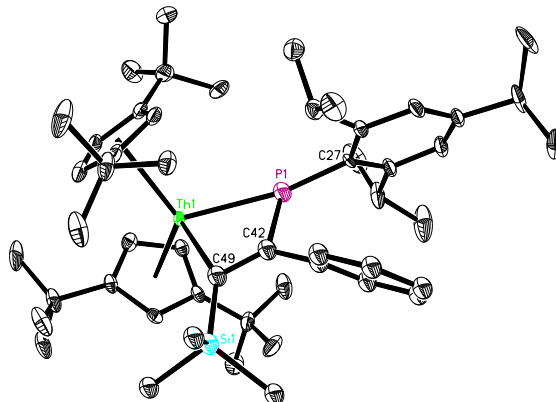

**Figure S3** Molecular structure of **6b** (thermal ellipsoids drawn at the 35% probability level).

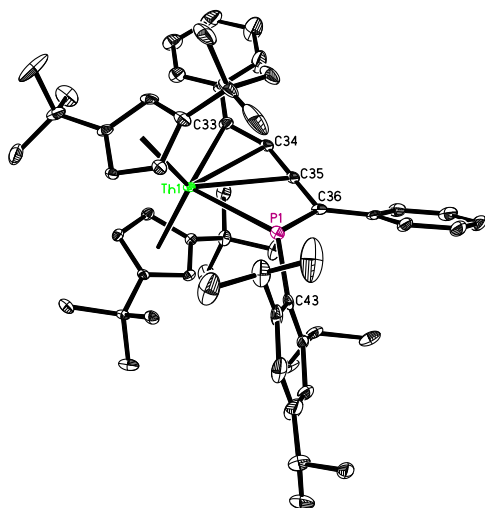

**Figure S4** Molecular structure of **7** (thermal ellipsoids drawn at the 35% probability level).

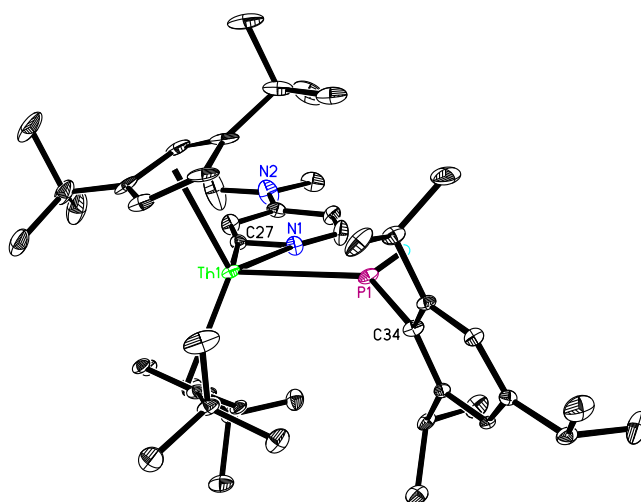

**Figure S5** Molecular structure of **14** (thermal ellipsoids drawn at the 35% probability level).

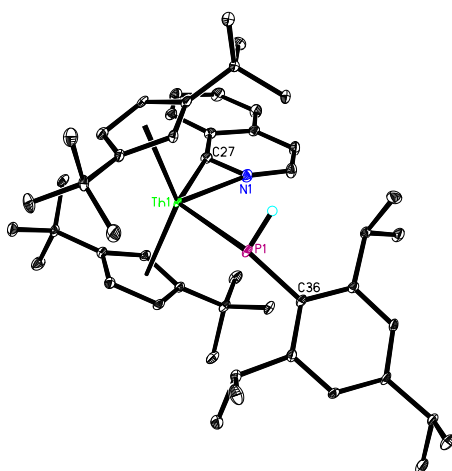

**Figure S6** Molecular structure of **15** (thermal ellipsoids drawn at the 35% probability level).

## 2. Crystal parameters

**Table S1. Crystal Data and Experimental Parameters for Compounds 2-5**

| Compound                                                      | <b>2</b> $2C_6H_6$            | <b>3</b>           | <b>4a</b>          | <b>5a</b>          |
|---------------------------------------------------------------|-------------------------------|--------------------|--------------------|--------------------|
| Formula                                                       | $C_{94}H_{142}Cl_2K_2P_2Th_2$ | $C_{56}H_{75}PTh$  | $C_{50}H_{73}PTh$  | $C_{55}H_{81}PTh$  |
| Fw                                                            | 1947.19                       | 999.16             | 937.09             | 1005.20            |
| crystal system                                                | monoclinic                    | monoclinic         | monoclinic         | monoclinic         |
| space group                                                   | $P2_1/c$                      | $P2_1/c$           | $P2_1/n$           | $P2_1/n$           |
| <i>a</i> (Å)                                                  | 11.599(1)                     | 11.993(1)          | 11.872(1)          | 10.943(1)          |
| <i>b</i> (Å)                                                  | 19.420(1)                     | 17.917(1)          | 18.664(1)          | 23.039(1)          |
| <i>c</i> (Å)                                                  | 20.564(1)                     | 24.087(1)          | 23.870(1)          | 19.901(1)          |
| $\alpha$ (deg)                                                | 90                            | 90                 | 90                 | 90                 |
| $\beta$ (deg)                                                 | 92.15(1)                      | 102.41(1)          | 98.70(1)           | 90.37(1)           |
| $\gamma$ (deg)                                                | 90                            | 90                 | 90                 | 90                 |
| <i>V</i> (Å <sup>3</sup> )                                    | 4628.6(3)                     | 5054.8(3)          | 5227.94(8)         | 5017.02(17)        |
| <i>Z</i>                                                      | 2                             | 4                  | 4                  | 4                  |
| <i>D</i> <sub>calc</sub> (g/cm <sup>3</sup> )                 | 1.397                         | 1.313              | 1.191              | 1.331              |
| $\mu(Mo/K\alpha)_{calc}$ (cm <sup>-1</sup> )                  | 3.433                         | 3.014              | 9.673              | 10.116             |
| size (mm)                                                     | 0.20 × 0.15 × 0.10            | 0.25 × 0.20 × 0.20 | 0.30 × 0.20 × 0.20 | 0.25 × 0.20 × 0.20 |
| <i>F</i> (000)                                                | 1976                          | 2040               | 1912               | 2064               |
| $2\theta$ range (deg)                                         | 6.60 to 59.73                 | 6.91 to 59.72      | 7.49 to 146.40     | 7.67 to 146.78     |
| no. of reflns, collected                                      | 25377                         | 2825               | 22145              | 37967              |
| no of obsd reflns                                             | 11042                         | 12102              | 10256              | 9973               |
| no of variables                                               | 466                           | 562                | 488                | 532                |
| abscorr ( <i>T</i> <sub>max</sub> , <i>T</i> <sub>min</sub> ) | 1.00, 0.85                    | 1.00, 0.63         | 1.00, 0.46         | 1.00, 0.50         |
| <i>R</i>                                                      | 0.047                         | 0.041              | 0.027              | 0.043              |
| <i>R</i> <sub>w</sub>                                         | 0.064                         | 0.061              | 0.068              | 0.110              |
| <i>R</i> <sub>all</sub>                                       | 0.071                         | 0.063              | 0.030              | 0.048              |
| Gof                                                           | 1.01                          | 1.03               | 1.04               | 1.03               |
| CCDC                                                          | 1904635                       | 1904623            | 1904628            | 1904626            |

**Table S2. Crystal Data and Experimental Parameters for Compounds 6-8**

| Compound                                                      | <b>6b</b>                             | <b>7</b>                            | <b>8</b>                                                          |
|---------------------------------------------------------------|---------------------------------------|-------------------------------------|-------------------------------------------------------------------|
| Formula                                                       | C <sub>52</sub> H <sub>79</sub> PSiTh | C <sub>57</sub> H <sub>75</sub> PTh | C <sub>51</sub> H <sub>83</sub> P <sub>2</sub> Si <sub>2</sub> Th |
| Fw                                                            | 995.25                                | 1023.18                             | 1015.36                                                           |
| crystal system                                                | monoclinic                            | monoclinic                          | orthorhombic                                                      |
| space group                                                   | <i>P2<sub>1</sub>/n</i>               | <i>P2<sub>1</sub>/c</i>             | <i>P2<sub>1</sub>2<sub>1</sub>2<sub>1</sub></i>                   |
| <i>a</i> (Å)                                                  | 14.445(1)                             | 14.779(1)                           | 10.493(1)                                                         |
| <i>b</i> (Å)                                                  | 16.993(1)                             | 16.968(1)                           | 20.177(1)                                                         |
| <i>c</i> (Å)                                                  | 20.973(1)                             | 20.157(1)                           | 24.535(1)                                                         |
| $\alpha$ (deg)                                                | 90                                    | 90                                  | 90                                                                |
| $\beta$ (deg)                                                 | 106.37(1)                             | 100.28(1)                           | 90                                                                |
| $\gamma$ (deg)                                                | 90                                    | 90                                  | 90                                                                |
| <i>V</i> (Å <sup>3</sup> )                                    | 4939.32(9)                            | 4973.4(3)                           | 5194.8(2)                                                         |
| <i>Z</i>                                                      | 4                                     | 4                                   | 4                                                                 |
| <i>D</i> <sub>calc</sub> (g/cm <sup>3</sup> )                 | 1.338                                 | 1.366                               | 1.298                                                             |
| $\mu$ (Mo/K $\alpha$ ) <sub>calc</sub> (cm <sup>-1</sup> )    | 10.493                                | 3.065                               | 2.977                                                             |
| size (mm)                                                     | 0.10 × 0.10 × 0.10                    | 0.25 × 0.20 × 0.20                  | 0.25 × 0.10 × 0.10                                                |
| <i>F</i> (000)                                                | 2040                                  | 2088                                | 2088                                                              |
| 2 $\theta$ range (deg)                                        | 6.81 to 144.07                        | 6.61 to 59.65                       | 6.41 to 59.67                                                     |
| no. of reflns, collected                                      | 21029                                 | 49330                               | 35914                                                             |
| no of obsd reflns                                             | 9510                                  | 12321                               | 12714                                                             |
| no of variables                                               | 462                                   | 580                                 | 533                                                               |
| abscorr ( <i>T</i> <sub>max</sub> , <i>T</i> <sub>min</sub> ) | 1.00, 0.89                            | 1.00, 0.74                          | 1.00, 0.86                                                        |
| <i>R</i>                                                      | 0.057                                 | 0.038                               | 0.036                                                             |
| <i>R</i> <sub>w</sub>                                         | 0.142                                 | 0.062                               | 0.050                                                             |
| <i>R</i> <sub>all</sub>                                       | 0.065                                 | 0.060                               | 0.043                                                             |
| Gof                                                           | 1.05                                  | 1.04                                | 1.01                                                              |
| CCDC                                                          | 1904624                               | 1904633                             | 1904625                                                           |

**Table S3. Crystal Data and Experimental Parameters for Compounds 10-12**

| Compound                                                      | <b>10</b>                          | <b>11</b>                                                                                                     | <b>12</b> 0.5C <sub>6</sub> H <sub>6</sub>            |
|---------------------------------------------------------------|------------------------------------|---------------------------------------------------------------------------------------------------------------|-------------------------------------------------------|
| Formula                                                       | C <sub>42</sub> H <sub>52</sub> Th | C <sub>96</sub> H <sub>140</sub> Cl <sub>2</sub> K <sub>2</sub> N <sub>2</sub> P <sub>2</sub> Th <sub>2</sub> | C <sub>45</sub> H <sub>68</sub> ClKPS <sub>2</sub> Th |
| Fw                                                            | 788.87                             | 1997.21                                                                                                       | 1010.67                                               |
| crystal system                                                | monoclinic                         | monoclinic                                                                                                    | monoclinic                                            |
| space group                                                   | <i>P2<sub>1</sub>/c</i>            | <i>C2/c</i>                                                                                                   | <i>P2<sub>1</sub>/n</i>                               |
| <i>a</i> (Å)                                                  | 11.177(1)                          | 24.882(1)                                                                                                     | 12.034(1)                                             |
| <i>b</i> (Å)                                                  | 9.597(1)                           | 11.683(1)                                                                                                     | 14.361(1)                                             |
| <i>c</i> (Å)                                                  | 33.637(1)                          | 32.216(1)                                                                                                     | 27.388(2)                                             |
| $\alpha$ (deg)                                                | 90                                 | 90                                                                                                            | 90                                                    |
| $\beta$ (deg)                                                 | 91.08(1)                           | 92.28(1)                                                                                                      | 100.61(1)                                             |
| $\gamma$ (deg)                                                | 90                                 | 90                                                                                                            | 90                                                    |
| <i>V</i> (Å <sup>3</sup> )                                    | 3607.41(16)                        | 9357.9(4)                                                                                                     | 4652.6(4)                                             |
| <i>Z</i>                                                      | 4                                  | 4                                                                                                             | 4                                                     |
| <i>D</i> <sub>calc</sub> (g/cm <sup>3</sup> )                 | 1.453                              | 1.418                                                                                                         | 1.443                                                 |
| $\mu$ (Mo/K $\alpha$ ) <sub>calc</sub> (cm <sup>-1</sup> )    | 4.160                              | 12.144                                                                                                        | 13.029                                                |
| size (mm)                                                     | 0.25 × 0.20 × 0.15                 | 0.10 × 0.08 × 0.02                                                                                            | 0.10 × 0.05 × 0.05                                    |
| <i>F</i> (000)                                                | 1576                               | 4040                                                                                                          | 2044                                                  |
| 2 $\theta$ range (deg)                                        | 6.64 to 59.75                      | 8.36 to 146.59                                                                                                | 6.98 to 146.46                                        |
| no. of reflns, collected                                      | 22887                              | 17598                                                                                                         | 19129                                                 |
| no of obsd reflns                                             | 8853                               | 9078                                                                                                          | 9071                                                  |
| no of variables                                               | 400                                | 496                                                                                                           | 478                                                   |
| abscorr ( <i>T</i> <sub>max</sub> , <i>T</i> <sub>min</sub> ) | 1.00, 0.84                         | 1.00, 0.93                                                                                                    | 1.00, 0.81                                            |
| <i>R</i>                                                      | 0.035                              | 0.044                                                                                                         | 0.064                                                 |
| <i>R</i> <sub>w</sub>                                         | 0.055                              | 0.093                                                                                                         | 0.125                                                 |
| <i>R</i> <sub>all</sub>                                       | 0.049                              | 0.062                                                                                                         | 0.097                                                 |
| Gof                                                           | 1.04                               | 1.03                                                                                                          | 1.04                                                  |
| CCDC                                                          | 1904630                            | 1904627                                                                                                       | 1904629                                               |

**Table S4. Crystal Data and Experimental Parameters for Compounds 13-15**

| Compound                                                      | <b>13</b>                                          | <b>14</b>                                          | <b>15</b>                            |
|---------------------------------------------------------------|----------------------------------------------------|----------------------------------------------------|--------------------------------------|
| Formula                                                       | C <sub>45</sub> H <sub>71</sub> N <sub>2</sub> PTh | C <sub>48</sub> H <sub>75</sub> N <sub>2</sub> PTh | C <sub>50</sub> H <sub>72</sub> NPTh |
| Fw                                                            | 903.04                                             | 943.11                                             | 950.09                               |
| crystal system                                                | monoclinic                                         | triclinic                                          | triclinic                            |
| space group                                                   | <i>P2<sub>1</sub>/c</i>                            | <i>P(-1)</i>                                       | <i>P(-1)</i>                         |
| <i>a</i> (Å)                                                  | 19.024(1)                                          | 10.605(1)                                          | 10.456(1)                            |
| <i>b</i> (Å)                                                  | 10.958(1)                                          | 14.088(1)                                          | 13.392(1)                            |
| <i>c</i> (Å)                                                  | 22.775(1)                                          | 17.095(1)                                          | 18.267(1)                            |
| $\alpha$ (deg)                                                | 90                                                 | 79.43(1)                                           | 103.60(1)                            |
| $\beta$ (deg)                                                 | 110.36(1)                                          | 88.35(1)                                           | 101.98(1)                            |
| $\gamma$ (deg)                                                | 90                                                 | 70.87(1)                                           | 106.92(1)                            |
| <i>V</i> (Å <sup>3</sup> )                                    | 4451.3(3)                                          | 2370.6(3)                                          | 2271.18(10)                          |
| <i>Z</i>                                                      | 4                                                  | 2                                                  | 2                                    |
| <i>D</i> <sub>calc</sub> (g/cm <sup>3</sup> )                 | 1.348                                              | 1.321                                              | 1.389                                |
| $\mu$ (Mo/K $\alpha$ ) <sub>calc</sub> (cm <sup>-1</sup> )    | 3.416                                              | 3.210                                              | 11.148                               |
| size (mm)                                                     | 0.25 × 0.20 × 0.20                                 | 0.30 × 0.25 × 0.20                                 | 0.20 × 0.15 × 0.15                   |
| <i>F</i> (000)                                                | 1840                                               | 964                                                | 968                                  |
| 2 $\theta$ range (deg)                                        | 6.66 to 59.85                                      | 6.63 to 59.56                                      | 7.27 to 146.31                       |
| no. of reflns, collected                                      | 30844                                              | 22442                                              | 15968                                |
| no of obsd reflns                                             | 10926                                              | 11321                                              | 8825                                 |
| no of variables                                               | 465                                                | 493                                                | 500                                  |
| abscorr ( <i>T</i> <sub>max</sub> , <i>T</i> <sub>min</sub> ) | 1.00, 0.93                                         | 1.00, 0.89                                         | 1.00, 0.57                           |
| <i>R</i>                                                      | 0.040                                              | 0.056                                              | 0.032                                |
| <i>R</i> <sub>w</sub>                                         | 0.057                                              | 0.112                                              | 0.079                                |
| <i>R</i> <sub>all</sub>                                       | 0.062                                              | 0.070                                              | 0.032                                |
| Gof                                                           | 1.04                                               | 1.09                                               | 1.02                                 |
| CCDC                                                          | 1904632                                            | 1904634                                            | 1904631                              |

### 3. Computational details

**Table S5.** The optimized Cartesian Coordinates (in Å) of stationary points for 2'+PhCCMe, obtained with B3PW91-PCM method.

| Species | Cartesian coordinates |           |           |           |  |
|---------|-----------------------|-----------|-----------|-----------|--|
| 2'      | C                     | 8.070957  | 13.133265 | 14.745395 |  |
|         | C                     | 6.814200  | 13.113977 | 15.410977 |  |
|         | H                     | 5.879366  | 12.786719 | 14.974662 |  |
|         | C                     | 6.960762  | 13.620901 | 16.729691 |  |
|         | C                     | 8.342354  | 13.922118 | 16.894047 |  |
|         | H                     | 8.794292  | 14.364073 | 17.774753 |  |
|         | C                     | 9.015817  | 13.640394 | 15.677103 |  |
|         | H                     | 10.065997 | 13.820259 | 15.483502 |  |
|         | C                     | 8.304934  | 12.811050 | 13.272321 |  |
|         | C                     | 9.799531  | 12.829592 | 12.923422 |  |
|         | H                     | 10.250450 | 13.806942 | 13.128417 |  |
|         | H                     | 9.937821  | 12.617107 | 11.856915 |  |
|         | H                     | 10.363025 | 12.071378 | 13.483061 |  |
|         | C                     | 7.726235  | 11.433908 | 12.901523 |  |
|         | H                     | 8.236761  | 10.614095 | 13.429042 |  |
|         | H                     | 7.848233  | 11.244648 | 11.827780 |  |
|         | H                     | 6.659510  | 11.364200 | 13.136762 |  |
|         | C                     | 7.592837  | 13.887816 | 12.427796 |  |
|         | H                     | 6.514408  | 13.890970 | 12.619810 |  |
|         | H                     | 7.747331  | 13.702371 | 11.357212 |  |
|         | H                     | 7.979973  | 14.885974 | 12.661882 |  |
|         | C                     | 5.852213  | 13.987266 | 17.710105 |  |
|         | C                     | 5.731441  | 15.525886 | 17.726893 |  |
|         | H                     | 6.662443  | 15.996371 | 18.063858 |  |
|         | H                     | 4.927502  | 15.838047 | 18.405622 |  |
|         | H                     | 5.501637  | 15.911711 | 16.726995 |  |
|         | C                     | 6.184032  | 13.501470 | 19.131156 |  |
|         | H                     | 6.230588  | 12.405278 | 19.163476 |  |
|         | H                     | 5.407645  | 13.822382 | 19.836621 |  |
|         | H                     | 7.139733  | 13.904748 | 19.488012 |  |
|         | C                     | 4.506817  | 13.389389 | 17.280457 |  |
|         | H                     | 4.186422  | 13.783371 | 16.308588 |  |
|         | H                     | 3.731789  | 13.649270 | 18.011575 |  |
|         | H                     | 4.565735  | 12.297668 | 17.209349 |  |
|         | C                     | 11.023388 | 11.375170 | 18.006437 |  |
|         | C                     | 10.932364 | 10.047104 | 17.507984 |  |
|         | H                     | 11.595200 | 9.618005  | 16.762501 |  |
|         | C                     | 9.956984  | 9.310276  | 18.238930 |  |
|         | C                     | 9.380849  | 10.223317 | 19.159920 |  |
|         | H                     | 8.598719  | 9.996150  | 19.875492 |  |
| C       | 10.019380             | 11.487847 | 19.006140 |           |  |
| H       | 9.818138              | 12.363847 | 19.613620 |           |  |
| C       | 12.194876             | 12.319466 | 17.755753 |           |  |
| C       | 11.873605             | 13.770620 | 18.136305 |           |  |
| H       | 11.084298             | 14.193933 | 17.508676 |           |  |
| H       | 12.766791             | 14.394800 | 18.013094 |           |  |
| H       | 11.559486             | 13.852172 | 19.182976 |           |  |
| C       | 12.672759             | 12.267415 | 16.296410 |           |  |
| H       | 12.986183             | 11.257445 | 16.009479 |           |  |
| H       | 13.536466             | 12.928672 | 16.157123 |           |  |
| H       | 11.891102             | 12.589624 | 15.599818 |           |  |
| C       | 13.354166             | 11.835428 | 18.657559 |           |  |
| H       | 13.065219             | 11.863259 | 19.714180 |           |  |
| H       | 14.235955             | 12.475911 | 18.526265 |           |  |



|               |                                                                                                                                                                                                                                                                                                                                                                                                                                                                                                                                                                                                                                                                                                                                                                                                                                                                                                                                                                                                                                                                                                                                                                                                                                                                                                                                                                                                                                                                                                                                                                                                                                                                                                                                                                                                                                                                        |                                                                                       |
|---------------|------------------------------------------------------------------------------------------------------------------------------------------------------------------------------------------------------------------------------------------------------------------------------------------------------------------------------------------------------------------------------------------------------------------------------------------------------------------------------------------------------------------------------------------------------------------------------------------------------------------------------------------------------------------------------------------------------------------------------------------------------------------------------------------------------------------------------------------------------------------------------------------------------------------------------------------------------------------------------------------------------------------------------------------------------------------------------------------------------------------------------------------------------------------------------------------------------------------------------------------------------------------------------------------------------------------------------------------------------------------------------------------------------------------------------------------------------------------------------------------------------------------------------------------------------------------------------------------------------------------------------------------------------------------------------------------------------------------------------------------------------------------------------------------------------------------------------------------------------------------------|---------------------------------------------------------------------------------------|
|               | H 13.639414 10.806050 18.413644<br>C 9.776605 7.797487 18.174425<br>C 9.556113 7.322144 16.728525<br>H 8.615679 7.727258 16.330961<br>H 9.490775 6.227529 16.690797<br>H 10.382646 7.622487 16.071472<br>C 11.066252 7.149125 18.721392<br>H 11.938607 7.415689 18.113324<br>H 10.973022 6.055639 18.719018<br>H 11.261223 7.472022 19.750647<br>C 8.591787 7.341506 19.033191<br>H 8.739960 7.600097 20.088512<br>H 8.482606 6.252034 18.971995<br>H 7.661789 7.803009 18.683159<br>C 4.537080 9.082728 17.020549<br>C 3.765507 8.825418 15.852164<br>C 2.468778 8.323376 15.974849<br>H 1.898029 8.132904 15.066953<br>C 1.878724 8.059763 17.212751<br>C 2.648608 8.304394 18.348272<br>H 2.211981 8.100308 19.325523<br>C 3.955138 8.797655 18.285439<br>C 4.309030 9.063355 14.451308<br>H 5.307002 9.502559 14.571879<br>C 3.456911 10.064163 13.660147<br>H 2.443793 9.684411 13.478381<br>H 3.910564 10.267985 12.681609<br>H 3.363415 11.014249 14.198335<br>C 4.475933 7.746232 13.681504<br>H 5.123807 7.051555 14.228033<br>H 4.923581 7.926921 12.695708<br>H 3.511507 7.247649 13.522090<br>C 0.459794 7.532597 17.328847<br>H 0.255313 7.392064 18.399906<br>C 0.293768 6.167532 16.646373<br>H 0.466012 6.240275 15.565641<br>H -0.721581 5.779652 16.795587<br>H 1.002441 5.434985 17.048506<br>C -0.567308 8.540860 16.793526<br>H -0.478701 9.505460 17.305664<br>H -1.589576 8.169266 16.937479<br>H -0.424889 8.718518 15.720616<br>C 4.699150 9.004553 19.596288<br>H 5.706339 9.354593 19.336867<br>C 4.850734 7.694539 20.381275<br>H 3.878666 7.295904 20.697214<br>H 5.450901 7.855418 21.285882<br>H 5.345640 6.926479 19.777025<br>C 4.039481 10.087837 20.460244<br>H 3.968943 11.036637 19.917360<br>H 4.619384 10.260051 21.376167<br>H 3.024372 9.799091 20.760404<br>P 6.237509 9.769065 16.890442<br>Th 8.353830 11.155126 16.767561 |                                                                                       |
| <b>PhCCMe</b> | C 15.444614 -0.133992 9.031285<br>C 16.404072 0.164835 9.712369<br>C 17.532026 0.517826 10.513769<br>C 18.830187 0.129601 10.134692<br>C 17.364812 1.260871 11.696776<br>C 19.926346 0.476770 10.918358<br>C 18.466094 1.604091 12.474901<br>C 19.749675 1.214370 12.089852                                                                                                                                                                                                                                                                                                                                                                                                                                                                                                                                                                                                                                                                                                                                                                                                                                                                                                                                                                                                                                                                                                                                                                                                                                                                                                                                                                                                                                                                                                                                                                                            | 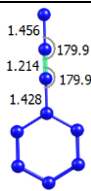 |

|             |                                |  |
|-------------|--------------------------------|--|
|             | H 18.966005 -0.444430 9.222563 |  |
|             | H 16.365081 1.563423 11.994986 |  |
|             | H 20.923495 0.169924 10.612953 |  |
|             | H 18.321602 2.178621 13.386349 |  |
|             | H 20.607992 1.483991 12.699714 |  |
|             | C 14.293024 -0.492949 8.215618 |  |
|             | H 14.586007 -0.676482 7.175026 |  |
|             | H 13.808818 -1.403174 8.590552 |  |
|             | H 13.542490 0.306630 8.215745  |  |
| <b>TS4a</b> | C 3.385105 3.725627 17.373232  |  |
|             | C 4.676733 4.236201 17.082749  |  |
|             | H 5.236669 4.035967 16.179066  |  |
|             | C 5.165072 4.974499 18.192619  |  |
|             | C 4.127202 4.972791 19.162572  |  |
|             | H 4.188796 5.403796 20.153331  |  |
|             | C 3.038209 4.211987 18.664007  |  |
|             | H 2.134560 3.973878 19.212300  |  |
|             | C 2.683658 2.628966 16.577996  |  |
|             | C 3.623831 1.404648 16.530342  |  |
|             | H 4.552717 1.634386 15.997587  |  |
|             | H 3.135174 0.568237 16.013881  |  |
|             | H 3.887709 1.074672 17.541633  |  |
|             | C 1.386257 2.193426 17.271418  |  |
|             | H 1.592645 1.746138 18.250672  |  |
|             | H 0.864891 1.442533 16.665477  |  |
|             | H 0.702979 3.034012 17.429200  |  |
|             | C 2.387727 3.064565 15.133991  |  |
|             | H 1.679494 3.899172 15.097352  |  |
|             | H 1.958741 2.232332 14.561024  |  |
|             | H 3.302705 3.385467 14.623790  |  |
|             | C 6.600954 5.428928 18.433162  |  |
|             | C 7.441953 5.326278 17.155217  |  |
|             | H 7.514841 4.288289 16.808921  |  |
|             | H 8.461974 5.679924 17.349504  |  |
|             | H 7.015236 5.931826 16.348891  |  |
|             | C 6.656227 6.872003 18.955353  |  |
|             | H 6.261432 7.568776 18.207075  |  |
|             | H 7.692097 7.159550 19.176512  |  |
|             | H 6.078271 6.988293 19.879740  |  |
|             | C 7.212284 4.492879 19.497952  |  |
|             | H 6.673049 4.562960 20.449646  |  |
|             | H 8.261540 4.757673 19.682067  |  |
|             | H 7.177606 3.448378 19.167026  |  |
|             | C 2.222202 9.321628 17.907480  |  |
|             | C 1.190088 8.500375 18.440387  |  |
|             | H 0.150092 8.534466 18.136695  |  |
|             | C 1.682337 7.748307 19.544103  |  |
|             | C 3.066232 8.043407 19.633577  |  |
|             | H 3.751845 7.668269 20.382486  |  |
|             | C 3.398423 8.997766 18.633088  |  |
|             | H 4.374750 9.448117 18.500281  |  |
|             | C 2.014032 10.521179 16.985391 |  |
|             | C 3.343674 11.217711 16.679053 |  |
|             | H 3.829543 11.577567 17.593682 |  |
|             | H 3.170012 12.085572 16.031257 |  |
|             | H 4.027373 10.537733 16.162263 |  |
|             | C 1.348140 10.138472 15.656626 |  |
|             | H 2.000109 9.479039 15.074480  |  |
|             | H 1.146194 11.038288 15.061304 |  |
|             | H 0.394750 9.623896 15.815903  |  |
|             | C 1.100461 11.519381 17.729075 |  |
|             | H 0.113913 11.086547 17.930955 |  |

|   |           |           |           |
|---|-----------|-----------|-----------|
| H | 0.956172  | 12.425547 | 17.126520 |
| H | 1.540476  | 11.814606 | 18.688711 |
| C | 0.809188  | 7.052264  | 20.585838 |
| C | 0.054387  | 8.159485  | 21.356206 |
| H | 0.757101  | 8.851251  | 21.834774 |
| H | -0.579065 | 7.720439  | 22.138084 |
| H | -0.586451 | 8.741915  | 20.685282 |
| C | 1.639850  | 6.257018  | 21.601407 |
| H | 2.177113  | 5.427036  | 21.132923 |
| H | 0.980584  | 5.832883  | 22.368430 |
| H | 2.370293  | 6.894581  | 22.112479 |
| C | -0.228244 | 6.119173  | 19.943460 |
| H | -0.864631 | 6.650153  | 19.228473 |
| H | -0.880851 | 5.688781  | 20.713553 |
| H | 0.249379  | 5.287646  | 19.412762 |
| C | 6.071590  | 7.574015  | 14.195874 |
| C | 6.969273  | 8.670774  | 14.329987 |
| C | 8.062763  | 8.784828  | 13.466953 |
| H | 8.737427  | 9.631739  | 13.587749 |
| C | 8.328082  | 7.863089  | 12.456835 |
| C | 7.444416  | 6.790235  | 12.332200 |
| H | 7.624207  | 6.047622  | 11.556429 |
| C | 6.337542  | 6.623425  | 13.166479 |
| C | 6.796073  | 9.751016  | 15.385344 |
| H | 5.911559  | 9.477949  | 15.973323 |
| C | 7.989631  | 9.814640  | 16.347836 |
| H | 8.175854  | 8.840587  | 16.812651 |
| H | 7.801869  | 10.543699 | 17.146397 |
| H | 8.909195  | 10.120068 | 15.833243 |
| C | 6.533271  | 11.121615 | 14.746815 |
| H | 7.390995  | 11.456750 | 14.150299 |
| H | 6.348016  | 11.879967 | 15.517587 |
| H | 5.659817  | 11.088178 | 14.086074 |
| C | 9.529270  | 8.024337  | 11.543003 |
| H | 10.042484 | 8.948214  | 11.845691 |
| C | 10.528055 | 6.869568  | 11.705522 |
| H | 10.857368 | 6.775193  | 12.746245 |
| H | 11.414139 | 7.031075  | 11.079199 |
| H | 10.080099 | 5.913313  | 11.409243 |
| C | 9.114731  | 8.188821  | 10.074057 |
| H | 8.609364  | 7.289740  | 9.701097  |
| H | 9.992874  | 8.363708  | 9.440150  |
| H | 8.428582  | 9.033790  | 9.948424  |
| C | 5.464474  | 5.400522  | 12.928099 |
| H | 4.641615  | 5.456325  | 13.652197 |
| C | 4.863122  | 5.387305  | 11.515492 |
| H | 4.325861  | 6.317451  | 11.298881 |
| H | 4.163185  | 4.549736  | 11.399473 |
| H | 5.639166  | 5.272088  | 10.748962 |
| C | 6.231441  | 4.098440  | 13.197814 |
| H | 7.064462  | 3.970991  | 12.495452 |
| H | 5.571855  | 3.227943  | 13.088556 |
| H | 6.649970  | 4.088667  | 14.209936 |
| C | 1.864670  | 6.980251  | 13.256961 |
| H | 1.027939  | 6.982368  | 12.543115 |
| H | 2.573251  | 6.203087  | 12.964468 |
| H | 2.387130  | 7.938013  | 13.208441 |
| C | 1.332624  | 6.728086  | 14.598126 |
| C | 0.526480  | 6.459366  | 15.489873 |
| C | -0.729132 | 6.205284  | 16.150847 |
| C | -1.593539 | 7.269472  | 16.470507 |
| H | -1.281789 | 8.288696  | 16.267551 |

|           |                                                                                                                                                                                                                                                                                                                                                                                                                                                                                                                                                                                                                                                                                                                                                                                                                                                                                                                                                                                                                                                                                                                                                                                                                                                                                                                                                                                                                                                                                                                                                                                                                                                                                                                                                                                          |  |
|-----------|------------------------------------------------------------------------------------------------------------------------------------------------------------------------------------------------------------------------------------------------------------------------------------------------------------------------------------------------------------------------------------------------------------------------------------------------------------------------------------------------------------------------------------------------------------------------------------------------------------------------------------------------------------------------------------------------------------------------------------------------------------------------------------------------------------------------------------------------------------------------------------------------------------------------------------------------------------------------------------------------------------------------------------------------------------------------------------------------------------------------------------------------------------------------------------------------------------------------------------------------------------------------------------------------------------------------------------------------------------------------------------------------------------------------------------------------------------------------------------------------------------------------------------------------------------------------------------------------------------------------------------------------------------------------------------------------------------------------------------------------------------------------------------------|--|
|           | C -2.850849 7.019769 17.011418<br>H -3.507160 7.853864 17.245344<br>C -3.272864 5.709610 17.243108<br>H -4.254916 5.518442 17.666819<br>C -2.431492 4.647545 16.912261<br>H -2.758124 3.622792 17.067962<br>C -1.173719 4.889739 16.367787<br>H -0.539605 4.059988 16.076691<br>P 4.618874 7.395673 15.318010<br>Th 3.069330 6.634368 17.197473                                                                                                                                                                                                                                                                                                                                                                                                                                                                                                                                                                                                                                                                                                                                                                                                                                                                                                                                                                                                                                                                                                                                                                                                                                                                                                                                                                                                                                          |  |
| <b>4a</b> | C 3.701616 3.702099 17.992027<br>C 4.987573 4.213076 17.657629<br>H 5.511475 4.020469 16.730711<br>C 5.517669 4.946370 18.754504<br>C 4.524633 4.932220 19.764307<br>H 4.606155 5.388678 20.744351<br>C 3.411801 4.183227 19.299140<br>H 2.527826 3.950469 19.881851<br>C 2.956883 2.605500 17.239539<br>C 3.549387 1.253936 17.696121<br>H 4.622723 1.202189 17.481540<br>H 3.055404 0.422778 17.176228<br>H 3.413793 1.110522 18.774345<br>C 1.456549 2.606746 17.556800<br>H 1.264499 2.493805 18.629825<br>H 0.964309 1.769328 17.047217<br>H 0.976473 3.530102 17.216443<br>C 3.143361 2.734725 15.721570<br>H 2.778134 3.700605 15.354165<br>H 2.592007 1.939812 15.204188<br>H 4.196669 2.640871 15.436629<br>C 6.924614 5.517047 18.895980<br>C 7.704799 5.410954 17.579689<br>H 7.824755 4.366141 17.270512<br>H 8.707664 5.837706 17.701505<br>H 7.199739 5.952778 16.772251<br>C 6.886370 6.991832 19.332740<br>H 6.410509 7.623539 18.570775<br>H 7.904169 7.373659 19.483377<br>H 6.341693 7.118794 20.275288<br>C 7.665591 4.701541 19.975559<br>H 7.166833 4.780842 20.948213<br>H 8.695134 5.064170 20.091562<br>H 7.705852 3.640416 19.704063<br>C 2.595680 9.151021 18.792137<br>C 1.347340 8.478300 18.677407<br>H 0.548459 8.752925 17.998915<br>C 1.250965 7.471463 19.680608<br>C 2.488808 7.465971 20.365249<br>H 2.750739 6.827847 21.199566<br>C 3.315389 8.482152 19.819270<br>H 4.302485 8.746333 20.182641<br>C 2.948324 10.501907 18.180909<br>C 4.462503 10.749428 18.197773<br>H 4.860987 10.743485 19.218871<br>H 4.686999 11.731987 17.765201<br>H 4.995715 9.991706 17.613536<br>C 2.426999 10.635195 16.743503<br>H 2.874744 9.878470 16.090600<br>H 2.674624 11.626277 16.343622<br>H 1.337088 10.528171 16.699889<br>C 2.269881 11.583234 19.051431 |  |

|   |           |           |           |
|---|-----------|-----------|-----------|
| H | 1.181400  | 11.456354 | 19.060085 |
| H | 2.494415  | 12.584694 | 18.661603 |
| H | 2.623962  | 11.532639 | 20.087581 |
| C | -0.004766 | 6.688933  | 20.044386 |
| C | -1.136451 | 7.690546  | 20.350712 |
| H | -0.857772 | 8.358619  | 21.174016 |
| H | -2.050901 | 7.156332  | 20.638663 |
| H | -1.370838 | 8.309230  | 19.477761 |
| C | 0.224698  | 5.830594  | 21.296037 |
| H | 1.012828  | 5.084933  | 21.141603 |
| H | -0.694721 | 5.291480  | 21.553238 |
| H | 0.505104  | 6.445682  | 22.159073 |
| C | -0.440094 | 5.784186  | 18.883691 |
| H | -0.663074 | 6.363111  | 17.982825 |
| H | -1.337895 | 5.211623  | 19.150645 |
| H | 0.349576  | 5.064683  | 18.632707 |
| C | 5.669874  | 7.526072  | 14.088842 |
| C | 6.269484  | 8.772714  | 13.772779 |
| C | 7.093595  | 8.868470  | 12.645944 |
| H | 7.554977  | 9.827060  | 12.414522 |
| C | 7.341539  | 7.790131  | 11.801316 |
| C | 6.745559  | 6.571068  | 12.127026 |
| H | 6.927099  | 5.707859  | 11.489963 |
| C | 5.931482  | 6.407316  | 13.250045 |
| C | 6.075777  | 10.029830 | 14.607037 |
| H | 5.329936  | 9.792440  | 15.373917 |
| C | 7.372537  | 10.422890 | 15.328167 |
| H | 7.737377  | 9.605569  | 15.960570 |
| H | 7.208785  | 11.300273 | 15.965650 |
| H | 8.167702  | 10.672090 | 14.614595 |
| C | 5.525957  | 11.200367 | 13.781116 |
| H | 6.232695  | 11.528472 | 13.009220 |
| H | 5.327580  | 12.061224 | 14.431079 |
| H | 4.588903  | 10.928985 | 13.282132 |
| C | 8.219732  | 7.945534  | 10.573021 |
| H | 8.597134  | 8.977692  | 10.575790 |
| C | 9.435585  | 7.009679  | 10.609635 |
| H | 10.029096 | 7.164464  | 11.517423 |
| H | 10.083249 | 7.187741  | 9.742833  |
| H | 9.130142  | 5.956839  | 10.584207 |
| C | 7.414782  | 7.751495  | 9.279652  |
| H | 7.013426  | 6.733117  | 9.212108  |
| H | 8.049075  | 7.919520  | 8.400802  |
| H | 6.569995  | 8.447353  | 9.229448  |
| C | 5.389808  | 5.010868  | 13.521148 |
| H | 4.772792  | 5.068987  | 14.424411 |
| C | 4.503745  | 4.490131  | 12.380919 |
| H | 3.664139  | 5.163591  | 12.181081 |
| H | 4.091957  | 3.507368  | 12.639675 |
| H | 5.070231  | 4.375030  | 11.448779 |
| C | 6.535921  | 4.026993  | 13.802290 |
| H | 7.185890  | 3.907145  | 12.927123 |
| H | 6.140293  | 3.035319  | 14.054207 |
| H | 7.159957  | 4.369598  | 14.634610 |
| C | 2.575513  | 7.690828  | 13.686600 |
| H | 1.565549  | 7.437477  | 13.352180 |
| H | 3.297469  | 7.319841  | 12.953368 |
| H | 2.675448  | 8.784205  | 13.690693 |
| C | 2.846985  | 7.139397  | 15.073095 |
| C | 1.865925  | 6.613952  | 15.872826 |
| C | 0.456857  | 6.560804  | 15.442641 |
| C | -0.326168 | 7.728230  | 15.344658 |

|             |                                                                                                                                                                                                                                                                                                                                                                                                                                                                                                                                                                                                                                                                                                                                                                                                                                                                                                                                                                                                                                                                                                                                                                                                                                                                                                                                                                                                                                                                                                                                                                                                                                                                                                                                                      |                                                                                     |
|-------------|------------------------------------------------------------------------------------------------------------------------------------------------------------------------------------------------------------------------------------------------------------------------------------------------------------------------------------------------------------------------------------------------------------------------------------------------------------------------------------------------------------------------------------------------------------------------------------------------------------------------------------------------------------------------------------------------------------------------------------------------------------------------------------------------------------------------------------------------------------------------------------------------------------------------------------------------------------------------------------------------------------------------------------------------------------------------------------------------------------------------------------------------------------------------------------------------------------------------------------------------------------------------------------------------------------------------------------------------------------------------------------------------------------------------------------------------------------------------------------------------------------------------------------------------------------------------------------------------------------------------------------------------------------------------------------------------------------------------------------------------------|-------------------------------------------------------------------------------------|
|             | H 0.139007 8.689225 15.550150<br>C -1.671584 7.674926 14.984443<br>H -2.245922 8.596804 14.919202<br>C -2.279747 6.451289 14.702882<br>H -3.329238 6.408197 14.422887<br>C -1.518675 5.284577 14.780972<br>H -1.973253 4.322481 14.554114<br>C -0.174937 5.338743 15.146534<br>H 0.404028 4.420598 15.194981<br>P 4.640855 7.369099 15.614714<br>Th 3.308418 6.556188 17.807837                                                                                                                                                                                                                                                                                                                                                                                                                                                                                                                                                                                                                                                                                                                                                                                                                                                                                                                                                                                                                                                                                                                                                                                                                                                                                                                                                                      |                                                                                     |
| <b>TS4b</b> | C 3.859400 3.529724 17.845482<br>C 5.196413 3.987144 17.711337<br>H 5.827075 3.830639 16.846582<br>C 5.608688 4.640022 18.903550<br>C 4.484196 4.632677 19.771729<br>H 4.470190 5.020185 20.781728<br>C 3.411288 3.961076 19.127901<br>H 2.449099 3.740175 19.577279<br>C 3.185482 2.514498 16.928688<br>C 3.715390 1.119821 17.330574<br>H 4.803999 1.066365 17.219432<br>H 3.267848 0.341938 16.698167<br>H 3.472135 0.893218 18.375100<br>C 1.660293 2.512685 17.089136<br>H 1.358481 2.325267 18.125988<br>H 1.218055 1.721773 16.471075<br>H 1.227821 3.465147 16.767960<br>C 3.533424 2.760940 15.453191<br>H 3.195326 3.746249 15.114844<br>H 3.055584 2.001616 14.821463<br>H 4.612590 2.701011 15.279556<br>C 7.028523 5.033303 19.298111<br>C 7.981959 4.976391 18.099172<br>H 8.045202 3.961772 17.688224<br>H 8.992061 5.267725 18.411704<br>H 7.660223 5.655084 17.302754<br>C 7.073059 6.444733 19.902451<br>H 6.739327 7.188005 19.167660<br>H 8.096651 6.699827 20.205290<br>H 6.438556 6.523081 20.793131<br>C 7.514608 4.023202 20.359825<br>H 6.886133 4.052094 21.257456<br>H 8.545653 4.251059 20.659808<br>H 7.492862 3.000365 19.966110<br>C 2.625216 9.050451 18.538751<br>C 1.662602 8.194420 19.144858<br>H 0.608016 8.181730 18.892751<br>C 2.239886 7.504179 20.244455<br>C 3.612171 7.873750 20.260091<br>H 4.351543 7.553951 20.984203<br>C 3.845401 8.824670 19.228886<br>H 4.790427 9.317036 19.032437<br>C 2.295575 10.209992 17.602611<br>C 3.545686 10.755438 16.903755<br>H 4.273092 11.140073 17.627927<br>H 3.271489 11.585964 16.241362<br>H 4.038206 9.977041 16.310797<br>C 1.259709 9.817371 16.539411<br>H 1.644022 9.039991 15.871810<br>H 0.999585 10.689726 15.927007<br>H 0.331596 9.447580 16.991108 | 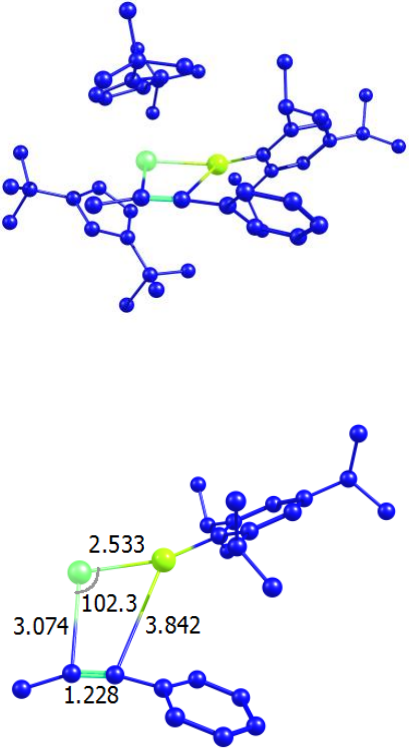 |

|   |           |           |           |
|---|-----------|-----------|-----------|
| C | 1.692818  | 11.334632 | 18.474550 |
| H | 0.771105  | 11.004238 | 18.967569 |
| H | 1.454821  | 12.211375 | 17.858071 |
| H | 2.398302  | 11.646660 | 19.253115 |
| C | 1.442304  | 6.858625  | 21.377408 |
| C | 0.851062  | 8.017988  | 22.212811 |
| H | 1.647204  | 8.653072  | 22.617149 |
| H | 0.264049  | 7.626047  | 23.053886 |
| H | 0.195770  | 8.649270  | 21.602528 |
| C | 2.306647  | 5.999038  | 22.308885 |
| H | 2.661163  | 5.090895  | 21.812867 |
| H | 1.715758  | 5.687200  | 23.178668 |
| H | 3.174666  | 6.551523  | 22.685472 |
| C | 0.280513  | 5.998713  | 20.860089 |
| H | -0.400771 | 6.572226  | 20.222045 |
| H | -0.307192 | 5.610233  | 21.701025 |
| H | 0.648673  | 5.138739  | 20.289001 |
| C | 6.868014  | 7.512517  | 15.124783 |
| C | 7.676467  | 8.660947  | 15.352691 |
| C | 8.836122  | 8.853094  | 14.597013 |
| H | 9.447208  | 9.734585  | 14.789041 |
| C | 9.245171  | 7.964667  | 13.604689 |
| C | 8.441930  | 6.844647  | 13.383864 |
| H | 8.733625  | 6.130261  | 12.615364 |
| C | 7.277260  | 6.595263  | 14.113455 |
| C | 7.338927  | 9.709958  | 16.401787 |
| H | 6.396363  | 9.400387  | 16.869625 |
| C | 8.405043  | 9.775879  | 17.504149 |
| H | 8.547532  | 8.797372  | 17.975529 |
| H | 8.111703  | 10.491112 | 18.283428 |
| H | 9.375866  | 10.099079 | 17.107666 |
| C | 7.115562  | 11.091591 | 15.772505 |
| H | 8.027594  | 11.472347 | 15.295928 |
| H | 6.813227  | 11.819598 | 16.535739 |
| H | 6.330494  | 11.055051 | 15.009146 |
| C | 10.510443 | 8.214863  | 12.803758 |
| H | 10.949355 | 9.149835  | 13.180253 |
| C | 11.548566 | 7.102968  | 13.010621 |
| H | 11.792538 | 6.982340  | 14.071953 |
| H | 12.475645 | 7.330518  | 12.469839 |
| H | 11.176115 | 6.139397  | 12.642365 |
| C | 10.210935 | 8.415227  | 11.311391 |
| H | 9.777675  | 7.509736  | 10.869545 |
| H | 11.128618 | 8.650150  | 10.757804 |
| H | 9.499685  | 9.234424  | 11.157313 |
| C | 6.500521  | 5.327447  | 13.787513 |
| H | 5.617452  | 5.315289  | 14.439093 |
| C | 6.005912  | 5.311885  | 12.335693 |
| H | 5.397125  | 6.194314  | 12.116760 |
| H | 5.391448  | 4.422071  | 12.149850 |
| H | 6.840717  | 5.291481  | 11.623419 |
| C | 7.326629  | 4.069096  | 14.088709 |
| H | 8.215603  | 4.008253  | 13.448244 |
| H | 6.731959  | 3.163964  | 13.910555 |
| H | 7.669030  | 4.056408  | 15.129036 |
| C | -0.007020 | 5.845154  | 17.091987 |
| H | -0.699645 | 5.124200  | 16.640921 |
| H | -0.555643 | 6.777420  | 17.265371 |
| H | 0.299065  | 5.452011  | 18.064193 |
| C | 1.110849  | 6.086153  | 16.168816 |
| C | 1.729555  | 6.341914  | 15.139188 |
| C | 2.145541  | 6.561557  | 13.783484 |

|           |                                                                                                                                                                                                                                                                                                                                                                                                                                                                                                                                                                                                                                                                                                                                                                                                                                                                                                                                                                                                                                                                                                                                                                                                                                                                                                                                                                                                                                                                                                                                                                                                                                                                                                                       |  |
|-----------|-----------------------------------------------------------------------------------------------------------------------------------------------------------------------------------------------------------------------------------------------------------------------------------------------------------------------------------------------------------------------------------------------------------------------------------------------------------------------------------------------------------------------------------------------------------------------------------------------------------------------------------------------------------------------------------------------------------------------------------------------------------------------------------------------------------------------------------------------------------------------------------------------------------------------------------------------------------------------------------------------------------------------------------------------------------------------------------------------------------------------------------------------------------------------------------------------------------------------------------------------------------------------------------------------------------------------------------------------------------------------------------------------------------------------------------------------------------------------------------------------------------------------------------------------------------------------------------------------------------------------------------------------------------------------------------------------------------------------|--|
|           | C 1.701606 5.649390 12.807821<br>H 1.151529 4.764882 13.115587<br>C 1.951601 5.888642 11.459674<br>H 1.605565 5.177011 10.714799<br>C 2.636740 7.038406 11.068001<br>H 2.827508 7.226342 10.014700<br>C 3.087419 7.942255 12.032943<br>H 3.633478 8.832442 11.733063<br>C 2.853502 7.706451 13.382937<br>H 3.234893 8.384260 14.139088<br>P 5.339190 7.231776 16.109418<br>Th 3.668476 6.434201 17.838047                                                                                                                                                                                                                                                                                                                                                                                                                                                                                                                                                                                                                                                                                                                                                                                                                                                                                                                                                                                                                                                                                                                                                                                                                                                                                                             |  |
| <b>4b</b> | C 4.052011 3.512227 18.259555<br>C 5.401522 3.965261 18.191712<br>H 6.064027 3.826827 17.347190<br>C 5.773456 4.556107 19.431451<br>C 4.622411 4.515500 20.258133<br>H 4.560992 4.859984 21.283455<br>C 3.572096 3.885851 19.541713<br>H 2.590652 3.660448 19.940752<br>C 3.370221 2.548112 17.296896<br>C 3.877261 1.127897 17.631889<br>H 4.964342 1.059173 17.511522<br>H 3.412723 0.387869 16.967217<br>H 3.635092 0.857339 18.666243<br>C 1.845029 2.569998 17.463378<br>H 1.540614 2.274440 18.473928<br>H 1.380389 1.864666 16.763730<br>H 1.438071 3.565860 17.258612<br>C 3.716976 2.862226 15.836964<br>H 3.397274 3.875009 15.569800<br>H 3.220921 2.149201 15.166651<br>H 4.794549 2.787622 15.657658<br>C 7.160308 5.018901 19.863255<br>C 8.116598 5.116262 18.667581<br>H 8.263094 4.139084 18.193692<br>H 9.099322 5.473188 18.998493<br>H 7.739360 5.811271 17.908158<br>C 7.095152 6.390317 20.557300<br>H 6.749576 7.172604 19.869073<br>H 8.090295 6.688170 20.910355<br>H 6.425601 6.378821 21.424533<br>C 7.720071 3.986464 20.863367<br>H 7.084765 3.910505 21.753167<br>H 8.728715 4.273180 21.187987<br>H 7.777975 2.992254 20.405935<br>C 2.927459 8.995066 19.186859<br>C 1.754025 8.191450 19.139978<br>H 0.914339 8.359256 18.474630<br>C 1.782004 7.236311 20.195126<br>C 3.031790 7.397018 20.845889<br>H 3.375167 6.844294 21.711408<br>C 3.733282 8.466513 20.230731<br>H 4.698361 8.846556 20.547714<br>C 3.118879 10.330394 18.480835<br>C 4.577988 10.796617 18.565627<br>H 4.888498 10.963134 19.603995<br>H 4.702872 11.745564 18.030357<br>H 5.254819 10.061167 18.117488<br>C 2.688098 10.258797 17.010602<br>H 3.290855 9.525300 16.466558<br>H 2.809439 11.237434 16.529245 |  |



|   |           |           |           |
|---|-----------|-----------|-----------|
| H | 1.635525  | 9.970629  | 16.911001 |
| C | 2.233140  | 11.367025 | 19.206533 |
| H | 1.174345  | 11.090015 | 19.150286 |
| H | 2.350835  | 12.357557 | 18.748028 |
| H | 2.505669  | 11.446034 | 20.265381 |
| C | 0.583667  | 6.436652  | 20.699129 |
| C | -0.470055 | 7.447838  | 21.201822 |
| H | -0.055041 | 8.087514  | 21.989017 |
| H | -1.341122 | 6.920425  | 21.611891 |
| H | -0.817103 | 8.095420  | 20.389251 |
| C | 0.971307  | 5.533199  | 21.877981 |
| H | 1.749115  | 4.812887  | 21.604250 |
| H | 0.096923  | 4.968044  | 22.221953 |
| H | 1.339833  | 6.121419  | 22.726249 |
| C | -0.058353 | 5.585175  | 19.593232 |
| H | -0.367399 | 6.201103  | 18.741859 |
| H | -0.953038 | 5.076994  | 19.974856 |
| H | 0.626875  | 4.815382  | 19.221332 |
| C | 6.515802  | 7.460434  | 14.798315 |
| C | 7.131632  | 8.728077  | 14.617136 |
| C | 8.122048  | 8.874025  | 13.639871 |
| H | 8.596818  | 9.845122  | 13.513671 |
| C | 8.526279  | 7.827122  | 12.816903 |
| C | 7.910175  | 6.590005  | 13.005432 |
| H | 8.216550  | 5.750369  | 12.385105 |
| C | 6.928224  | 6.377469  | 13.975626 |
| C | 6.801375  | 9.944519  | 15.468754 |
| H | 5.859080  | 9.725623  | 15.984841 |
| C | 7.874363  | 10.156568 | 16.546450 |
| H | 7.968499  | 9.273252  | 17.188499 |
| H | 7.625217  | 11.015926 | 17.181007 |
| H | 8.855047  | 10.345325 | 16.091957 |
| C | 6.593761  | 11.224500 | 14.648727 |
| H | 7.525354  | 11.586434 | 14.197636 |
| H | 6.216591  | 12.025534 | 15.295740 |
| H | 5.870074  | 11.070821 | 13.840610 |
| C | 9.602682  | 8.031153  | 11.766526 |
| H | 9.913295  | 9.083877  | 11.823938 |
| C | 10.841996 | 7.169136  | 12.046682 |
| H | 11.246346 | 7.368650  | 13.045256 |
| H | 11.629291 | 7.374382  | 11.311167 |
| H | 10.603968 | 6.100128  | 11.989625 |
| C | 9.069364  | 7.783757  | 10.348485 |
| H | 8.758074  | 6.740461  | 10.217422 |
| H | 9.844628  | 7.996241  | 9.602258  |
| H | 8.203626  | 8.419814  | 10.133762 |
| C | 6.401573  | 4.959876  | 14.132530 |
| H | 5.562864  | 4.994602  | 14.835146 |
| C | 5.887695  | 4.360517  | 12.816868 |
| H | 5.143621  | 5.009948  | 12.346658 |
| H | 5.422198  | 3.385246  | 13.004973 |
| H | 6.699681  | 4.198033  | 12.097918 |
| C | 7.486219  | 4.058547  | 14.741931 |
| H | 8.351771  | 3.978095  | 14.072956 |
| H | 7.102616  | 3.043994  | 14.908974 |
| H | 7.841915  | 4.455645  | 15.698246 |
| C | 1.147188  | 6.216817  | 15.852777 |
| H | 0.921447  | 5.161993  | 15.640335 |
| H | 0.923686  | 6.780658  | 14.937179 |
| H | 0.431117  | 6.528485  | 16.622573 |
| C | 2.563084  | 6.383380  | 16.340510 |
| C | 3.575406  | 6.874513  | 15.553235 |

|  |    |          |          |           |  |
|--|----|----------|----------|-----------|--|
|  | C  | 3.362019 | 7.244016 | 14.120805 |  |
|  | C  | 2.839307 | 6.302282 | 13.220945 |  |
|  | H  | 2.634927 | 5.293851 | 13.569707 |  |
|  | C  | 2.588998 | 6.639296 | 11.891041 |  |
|  | H  | 2.188107 | 5.889312 | 11.213147 |  |
|  | C  | 2.847823 | 7.930497 | 11.433694 |  |
|  | H  | 2.649582 | 8.196245 | 10.398376 |  |
|  | C  | 3.365772 | 8.877522 | 12.317351 |  |
|  | H  | 3.571172 | 9.888415 | 11.973230 |  |
|  | C  | 3.629521 | 8.534904 | 13.641254 |  |
|  | H  | 4.037744 | 9.278281 | 14.318986 |  |
|  | P  | 5.332050 | 7.243842 | 16.198870 |  |
|  | Th | 3.895079 | 6.409431 | 18.322900 |  |

**Table S6.** Frequencies of the stationary points optimized for **2'**+PhC<sub>2</sub>Me.

| Species   | Frequencies (cm <sup>-1</sup> ) |      |      |      |      |      |      |      |      |      |      |      |     |     |
|-----------|---------------------------------|------|------|------|------|------|------|------|------|------|------|------|-----|-----|
| <b>2'</b> | 16                              | 18   | 20   | 30   | 35   | 36   | 42   | 46   | 51   | 58   | 63   | 66   | 78  |     |
|           | 81                              | 85   | 88   | 92   | 106  | 113  | 120  | 125  | 128  | 131  | 139  | 147  |     |     |
|           | 155                             | 173  | 181  | 194  | 200  | 205  | 213  | 222  | 229  | 237  | 239  | 240  |     |     |
|           | 243                             | 244  | 246  | 248  | 250  | 251  | 256  | 260  | 265  | 266  | 267  | 272  |     |     |
|           | 281                             | 290  | 291  | 294  | 297  | 316  | 322  | 323  | 326  | 332  | 336  | 345  |     |     |
|           | 349                             | 352  | 363  | 364  | 367  | 369  | 371  | 379  | 385  | 389  | 406  | 411  |     |     |
|           | 423                             | 438  | 447  | 448  | 450  | 458  | 484  | 487  | 501  | 505  | 506  | 520  |     |     |
|           | 527                             | 558  | 566  | 581  | 608  | 617  | 621  | 645  | 649  | 654  | 670  | 674  |     |     |
|           | 690                             | 691  | 770  | 775  | 789  | 827  | 830  | 833  | 834  | 836  | 840  | 844  |     |     |
|           | 850                             | 857  | 857  | 900  | 902  | 911  | 934  | 935  | 936  | 937  | 942  | 944  |     |     |
|           | 947                             | 947  | 951  | 953  | 954  | 955  | 956  | 958  | 960  | 960  | 965  | 965  |     |     |
|           | 972                             | 972  | 973  | 974  | 977  | 980  | 1048 | 1051 | 1053 | 1053 | 1055 |      |     |     |
|           | 1056                            | 1062 | 1071 | 1075 | 1079 | 1083 | 1088 | 1100 | 1117 | 1122 | 1130 |      |     |     |
|           | 1139                            | 1141 | 1143 | 1165 | 1190 | 1201 | 1201 | 1206 | 1214 | 1218 | 1224 |      |     |     |
|           | 1233                            | 1241 | 1242 | 1244 | 1245 | 1248 | 1273 | 1274 | 1275 | 1287 | 1287 |      |     |     |
|           | 1289                            | 1296 | 1333 | 1344 | 1349 | 1357 | 1366 | 1368 | 1376 | 1396 | 1398 |      |     |     |
|           | 1402                            | 1403 | 1404 | 1413 | 1413 | 1414 | 1414 | 1415 | 1416 | 1417 | 1418 |      |     |     |
|           | 1421                            | 1425 | 1429 | 1432 | 1433 | 1434 | 1442 | 1445 | 1450 | 1453 | 1471 |      |     |     |
|           | 1475                            | 1476 | 1484 | 1501 | 1501 | 1503 | 1504 | 1506 | 1506 | 1507 | 1508 |      |     |     |
|           | 1508                            | 1510 | 1511 | 1511 | 1512 | 1512 | 1512 | 1514 | 1514 | 1515 | 1521 |      |     |     |
|           | 1522                            | 1523 | 1523 | 1524 | 1525 | 1525 | 1526 | 1528 | 1528 | 1530 | 1533 |      |     |     |
|           | 1536                            | 1539 | 1543 | 1546 | 1549 | 1555 | 1588 | 1604 | 1608 | 1660 | 3035 |      |     |     |
|           | 3039                            | 3041 | 3042 | 3043 | 3044 | 3045 | 3045 | 3046 | 3046 | 3046 | 3047 |      |     |     |
|           | 3050                            | 3050 | 3051 | 3052 | 3053 | 3054 | 3056 | 3057 | 3063 | 3106 | 3111 |      |     |     |
|           | 3111                            | 3112 | 3115 | 3116 | 3116 | 3117 | 3118 | 3119 | 3120 | 3120 | 3123 |      |     |     |
|           | 3123                            | 3124 | 3124 | 3125 | 3126 | 3127 | 3129 | 3130 | 3131 | 3131 | 3132 |      |     |     |
|           | 3132                            | 3133 | 3134 | 3134 | 3137 | 3138 | 3139 | 3139 | 3141 | 3145 | 3145 |      |     |     |
|           | 3159                            | 3170 | 3172 | 3222 | 3237 | 3245 | 3255 | 3264 | 3270 |      |      |      |     |     |
|           | <b>PhCCMe</b>                   | 21   | 92   | 96   | 249  | 295  | 395  | 404  | 411  | 521  | 547  | 633  | 706 | 716 |
|           |                                 | 772  | 857  | 929  | 974  | 998  | 1001 | 1015 | 1057 | 1060 | 1063 | 1111 |     |     |
|           |                                 | 1190 | 1208 | 1309 | 1337 | 1373 | 1433 | 1489 | 1494 | 1495 | 1543 | 1637 |     |     |
|           |                                 | 1670 | 2353 | 3047 | 3117 | 3122 | 3197 | 3205 | 3216 | 3223 | 3228 |      |     |     |
|           | <b>TS4a</b>                     | -72  | 18   | 23   | 25   | 29   | 34   | 36   | 41   | 45   | 49   | 53   | 54  |     |
| 60        |                                 | 62   | 67   | 70   | 77   | 79   | 84   | 86   | 92   | 96   | 98   | 99   |     |     |
| 101       |                                 | 105  | 114  | 122  | 130  | 133  | 143  | 144  | 150  | 160  | 172  | 177  |     |     |
| 182       |                                 | 193  | 197  | 202  | 212  | 224  | 229  | 233  | 234  | 236  | 239  | 247  |     |     |
| 247       |                                 | 248  | 250  | 251  | 251  | 259  | 259  | 260  | 263  | 270  | 272  | 275  |     |     |
| 297       |                                 | 300  | 301  | 303  | 307  | 312  | 319  | 321  | 322  | 325  | 327  | 334  |     |     |
| 338       |                                 | 349  | 350  | 352  | 357  | 358  | 365  | 368  | 373  | 381  | 384  | 392  |     |     |
| 406       |                                 | 408  | 415  | 422  | 424  | 426  | 436  | 449  | 449  | 458  | 478  | 487  |     |     |
| 500       |                                 | 502  | 505  | 511  | 516  | 527  | 558  | 560  | 583  | 607  | 611  | 622  |     |     |
| 632       |                                 | 643  | 648  | 655  | 662  | 668  | 683  | 686  | 706  | 725  | 766  | 771  |     |     |
| 778       |                                 | 790  | 831  | 831  | 832  | 834  | 838  | 842  | 857  | 857  | 858  | 865  |     |     |
| 873       |                                 | 901  | 904  | 915  | 932  | 935  | 937  | 937  | 938  | 939  | 943  | 945  |     |     |
| 949       |                                 | 950  | 953  | 954  | 956  | 957  | 959  | 959  | 961  | 966  | 966  | 970  |     |     |
| 972       |                                 | 972  | 972  | 974  | 975  | 980  | 985  | 1003 | 1016 | 1035 | 1048 |      |     |     |
| 1051      |                                 | 1052 | 1053 | 1056 | 1058 | 1059 | 1061 | 1063 | 1063 | 1069 | 1080 |      |     |     |
| 1083      |                                 | 1089 | 1094 | 1112 | 1117 | 1118 | 1132 | 1137 | 1139 | 1140 | 1163 |      |     |     |
| 1191      |                                 | 1192 | 1199 | 1204 | 1207 | 1210 | 1217 | 1218 | 1222 | 1236 | 1236 |      |     |     |
| 1243      |                                 | 1243 | 1246 | 1248 | 1271 | 1272 | 1273 | 1275 | 1279 | 1286 | 1288 |      |     |     |
| 1294      |                                 | 1337 | 1337 | 1343 | 1343 | 1356 | 1362 | 1364 | 1370 | 1374 | 1390 |      |     |     |
| 1399      |                                 | 1403 | 1404 | 1405 | 1413 | 1413 | 1415 | 1415 | 1415 | 1416 | 1417 |      |     |     |
| 1418      |                                 | 1419 | 1422 | 1424 | 1425 | 1434 | 1435 | 1437 | 1442 | 1444 | 1448 |      |     |     |
| 1449      |                                 | 1469 | 1471 | 1475 | 1482 | 1482 | 1488 | 1488 | 1500 | 1502 | 1503 |      |     |     |
| 1504      |                                 | 1505 | 1506 | 1507 | 1507 | 1508 | 1510 | 1510 | 1510 | 1511 | 1512 |      |     |     |
| 1513      |                                 | 1514 | 1514 | 1515 | 1521 | 1523 | 1524 | 1524 | 1525 | 1525 | 1526 |      |     |     |
| 1526      |                                 | 1528 | 1529 | 1530 | 1531 | 1532 | 1535 | 1536 | 1538 | 1539 | 1544 |      |     |     |
| 1550      |                                 | 1554 | 1566 | 1602 | 1635 | 1660 | 1663 | 2219 | 3040 | 3041 | 3043 |      |     |     |
| 3044      |                                 | 3045 | 3045 | 3046 | 3046 | 3046 | 3047 | 3047 | 3048 | 3050 | 3051 |      |     |     |
| 3052      |                                 | 3054 | 3054 | 3055 | 3056 | 3058 | 3060 | 3062 | 3113 | 3113 | 3116 |      |     |     |

|             |      |      |      |      |      |      |      |      |      |      |      |      |     |
|-------------|------|------|------|------|------|------|------|------|------|------|------|------|-----|
|             |      | 3118 | 3118 | 3119 | 3120 | 3120 | 3121 | 3121 | 3122 | 3122 | 3123 | 3124 |     |
|             |      | 3125 | 3126 | 3127 | 3128 | 3130 | 3131 | 3131 | 3131 | 3133 | 3133 | 3135 |     |
|             |      | 3137 | 3138 | 3138 | 3138 | 3141 | 3143 | 3147 | 3148 | 3148 | 3151 | 3153 |     |
|             |      | 3155 | 3171 | 3178 | 3183 | 3204 | 3212 | 3225 | 3236 | 3246 | 3248 | 3249 |     |
|             |      | 3250 | 3267 | 3273 | 3274 |      |      |      |      |      |      |      |     |
| <b>4a</b>   | 17   | 20   | 24   | 30   | 33   | 34   | 37   | 43   | 46   | 49   | 51   | 53   | 63  |
|             |      | 68   | 73   | 79   | 81   | 85   | 85   | 90   | 91   | 95   | 106  | 110  | 114 |
|             |      | 126  | 128  | 131  | 137  | 142  | 146  | 154  | 170  | 172  | 182  | 187  | 192 |
|             |      | 197  | 201  | 204  | 216  | 229  | 230  | 233  | 239  | 243  | 244  | 245  | 247 |
|             |      | 248  | 251  | 253  | 256  | 261  | 263  | 267  | 273  | 275  | 284  | 293  | 294 |
|             |      | 297  | 298  | 303  | 309  | 319  | 323  | 327  | 328  | 340  | 341  | 345  | 353 |
|             |      | 358  | 361  | 363  | 367  | 373  | 376  | 381  | 386  | 393  | 414  | 417  | 418 |
|             |      | 421  | 441  | 444  | 446  | 450  | 464  | 477  | 488  | 498  | 500  | 506  | 516 |
|             |      | 526  | 528  | 551  | 561  | 566  | 575  | 585  | 612  | 614  | 621  | 632  | 650 |
|             |      | 654  | 662  | 671  | 677  | 691  | 694  | 695  | 717  | 774  | 777  | 778  | 787 |
|             |      | 831  | 832  | 833  | 837  | 838  | 841  | 843  | 852  | 855  | 857  | 859  | 860 |
|             |      | 903  | 907  | 919  | 921  | 938  | 939  | 939  | 940  | 942  | 943  | 945  | 947 |
|             |      | 949  | 951  | 952  | 956  | 959  | 960  | 960  | 961  | 965  | 967  | 969  | 969 |
|             |      | 971  | 972  | 974  | 974  | 975  | 980  | 989  | 1011 | 1040 | 1050 | 1050 |     |
|             |      | 1051 | 1053 | 1054 | 1056 | 1057 | 1062 | 1065 | 1072 | 1081 | 1082 | 1086 |     |
|             |      | 1101 | 1105 | 1118 | 1119 | 1123 | 1132 | 1137 | 1139 | 1143 | 1168 | 1184 |     |
|             | 1193 | 1201 | 1204 | 1205 | 1206 | 1215 | 1217 | 1227 | 1232 | 1239 | 1240 | 1241 |     |
|             |      | 1243 | 1245 | 1249 | 1271 | 1274 | 1278 | 1288 | 1288 | 1292 | 1298 | 1327 |     |
|             |      | 1343 | 1344 | 1351 | 1357 | 1364 | 1368 | 1370 | 1372 | 1395 | 1399 | 1400 |     |
|             |      | 1404 | 1406 | 1411 | 1412 | 1413 | 1415 | 1415 | 1416 | 1417 | 1418 | 1421 |     |
|             |      | 1421 | 1422 | 1425 | 1435 | 1436 | 1437 | 1443 | 1447 | 1448 | 1449 | 1471 |     |
|             |      | 1478 | 1482 | 1483 | 1485 | 1486 | 1499 | 1501 | 1501 | 1502 | 1502 | 1505 |     |
|             |      | 1506 | 1506 | 1507 | 1507 | 1508 | 1510 | 1510 | 1511 | 1512 | 1512 | 1513 |     |
|             |      | 1513 | 1514 | 1516 | 1521 | 1521 | 1522 | 1523 | 1523 | 1524 | 1525 | 1526 |     |
|             |      | 1527 | 1529 | 1529 | 1530 | 1532 | 1535 | 1541 | 1541 | 1543 | 1550 | 1551 |     |
|             |      | 1577 | 1611 | 1630 | 1631 | 1661 | 1662 | 3044 | 3045 | 3045 | 3046 | 3047 |     |
|             |      | 3048 | 3050 | 3050 | 3050 | 3051 | 3051 | 3052 | 3053 | 3054 | 3055 | 3055 |     |
|             |      | 3055 | 3055 | 3058 | 3062 | 3073 | 3084 | 3119 | 3119 | 3119 | 3121 | 3121 |     |
|             |      | 3121 | 3122 | 3122 | 3123 | 3124 | 3125 | 3126 | 3127 | 3127 | 3127 | 3128 |     |
|             |      | 3128 | 3128 | 3130 | 3131 | 3132 | 3133 | 3133 | 3134 | 3134 | 3135 | 3136 |     |
|             |      | 3137 | 3137 | 3138 | 3138 | 3139 | 3139 | 3142 | 3143 | 3145 | 3158 | 3167 |     |
|             |      | 3182 | 3185 | 3189 | 3191 | 3206 | 3212 | 3220 | 3238 | 3244 | 3253 | 3254 |     |
|             |      | 3265 | 3272 |      |      |      |      |      |      |      |      |      |     |
| <b>TS4b</b> | -13  | 12   | 18   | 20   | 24   | 30   | 35   | 37   | 42   | 46   | 48   | 53   |     |
|             |      | 55   | 56   | 58   | 61   | 68   | 69   | 74   | 76   | 85   | 87   | 89   | 90  |
|             |      | 103  | 113  | 118  | 126  | 127  | 130  | 139  | 147  | 152  | 154  | 161  | 174 |
|             |      | 184  | 188  | 197  | 201  | 207  | 214  | 221  | 223  | 229  | 233  | 235  | 238 |
|             |      | 241  | 245  | 246  | 247  | 251  | 251  | 252  | 257  | 258  | 266  | 267  | 270 |
|             |      | 286  | 289  | 290  | 291  | 297  | 299  | 301  | 303  | 314  | 319  | 328  | 334 |
|             |      | 340  | 343  | 344  | 353  | 361  | 363  | 366  | 368  | 380  | 382  | 386  | 389 |
|             |      | 406  | 407  | 413  | 418  | 426  | 436  | 438  | 446  | 451  | 457  | 476  | 487 |
|             |      | 500  | 501  | 511  | 511  | 529  | 537  | 559  | 560  | 583  | 605  | 613  | 621 |
|             |      | 630  | 647  | 648  | 654  | 661  | 665  | 684  | 687  | 695  | 725  | 752  | 769 |
|             |      | 771  | 773  | 818  | 826  | 829  | 831  | 833  | 837  | 841  | 844  | 849  | 858 |
|             |      | 862  | 903  | 904  | 914  | 932  | 933  | 936  | 937  | 938  | 939  | 940  | 946 |
|             |      | 947  | 948  | 953  | 954  | 955  | 957  | 958  | 960  | 961  | 965  | 967  | 968 |
|             |      | 969  | 973  | 973  | 973  | 975  | 981  | 987  | 1002 | 1015 | 1037 | 1047 |     |
|             |      | 1051 | 1052 | 1053 | 1053 | 1054 | 1056 | 1057 | 1062 | 1071 | 1083 | 1084 |     |
|             |      | 1085 | 1088 | 1104 | 1113 | 1116 | 1120 | 1133 | 1138 | 1140 | 1141 | 1166 |     |
|             | 1191 | 1192 | 1200 | 1202 | 1205 | 1210 | 1215 | 1218 | 1227 | 1233 | 1238 |      |     |
|             |      | 1239 | 1244 | 1245 | 1249 | 1274 | 1274 | 1276 | 1281 | 1287 | 1288 | 1289 |     |
|             |      | 1298 | 1336 | 1341 | 1342 | 1352 | 1357 | 1365 | 1370 | 1375 | 1377 | 1397 |     |
|             |      | 1401 | 1402 | 1402 | 1405 | 1410 | 1413 | 1413 | 1414 | 1414 | 1415 | 1416 |     |
|             |      | 1418 | 1421 | 1422 | 1424 | 1434 | 1435 | 1435 | 1436 | 1443 | 1445 | 1446 |     |
|             |      | 1452 | 1472 | 1475 | 1476 | 1481 | 1488 | 1496 | 1497 | 1500 | 1501 | 1502 |     |
|             |      | 1503 | 1506 | 1506 | 1507 | 1508 | 1508 | 1508 | 1509 | 1510 | 1510 | 1512 |     |
|             |      | 1512 | 1513 | 1515 | 1516 | 1519 | 1521 | 1521 | 1521 | 1522 | 1523 | 1524 |     |

|           |      |      |      |      |      |      |      |      |      |      |      |     |
|-----------|------|------|------|------|------|------|------|------|------|------|------|-----|
|           | 1524 | 1526 | 1528 | 1529 | 1530 | 1531 | 1536 | 1537 | 1537 | 1541 | 1543 |     |
|           | 1549 | 1552 | 1572 | 1603 | 1636 | 1660 | 1664 | 2247 | 3040 | 3042 | 3042 |     |
|           | 3043 | 3044 | 3044 | 3045 | 3045 | 3045 | 3046 | 3047 | 3047 | 3051 | 3052 |     |
|           | 3052 | 3053 | 3055 | 3055 | 3055 | 3060 | 3062 | 3063 | 3110 | 3111 | 3116 |     |
|           | 3116 | 3117 | 3118 | 3119 | 3119 | 3119 | 3120 | 3120 | 3123 | 3123 | 3123 |     |
|           | 3123 | 3124 | 3129 | 3129 | 3129 | 3131 | 3131 | 3131 | 3132 | 3132 | 3133 |     |
|           | 3133 | 3133 | 3134 | 3134 | 3136 | 3138 | 3144 | 3146 | 3146 | 3150 | 3151 |     |
|           | 3157 | 3167 | 3172 | 3175 | 3202 | 3212 | 3221 | 3229 | 3239 | 3239 | 3241 |     |
|           | 3246 | 3261 | 3274 | 3279 |      |      |      |      |      |      |      |     |
| <b>4b</b> | 1620 | 25   | 28   | 37   | 41   | 44   | 46   | 48   | 54   | 59   | 62   | 66  |
|           | 71   | 74   | 78   | 81   | 83   | 87   | 89   | 92   | 94   | 100  | 108  | 113 |
|           | 122  | 130  | 132  | 137  | 141  | 144  | 147  | 167  | 177  | 181  | 183  | 188 |
|           | 197  | 204  | 211  | 223  | 232  | 234  | 236  | 237  | 240  | 247  | 249  | 252 |
|           | 255  | 256  | 260  | 261  | 264  | 265  | 266  | 271  | 275  | 285  | 296  | 299 |
|           | 301  | 305  | 310  | 311  | 312  | 313  | 319  | 321  | 330  | 332  | 335  | 342 |
|           | 344  | 350  | 356  | 360  | 366  | 367  | 368  | 371  | 380  | 390  | 392  | 418 |
|           | 422  | 428  | 428  | 439  | 447  | 449  | 461  | 481  | 487  | 489  | 501  | 506 |
|           | 506  | 529  | 544  | 558  | 559  | 582  | 604  | 611  | 616  | 621  | 633  | 650 |
|           | 654  | 662  | 664  | 677  | 686  | 697  | 699  | 714  | 772  | 777  | 780  | 799 |
|           | 830  | 830  | 832  | 835  | 836  | 842  | 847  | 857  | 859  | 860  | 870  | 882 |
|           | 901  | 904  | 913  | 931  | 936  | 937  | 937  | 937  | 938  | 940  | 942  | 946 |
|           | 948  | 950  | 952  | 956  | 958  | 960  | 960  | 962  | 965  | 966  | 967  | 969 |
|           | 971  | 972  | 974  | 974  | 975  | 994  | 996  | 1015 | 1037 | 1048 | 1050 |     |
|           | 1050 | 1052 | 1053 | 1054 | 1055 | 1060 | 1060 | 1064 | 1084 | 1086 | 1091 |     |
|           | 1101 | 1111 | 1116 | 1127 | 1129 | 1134 | 1136 | 1140 | 1141 | 1170 | 1188 |     |
|           | 1192 | 1202 | 1203 | 1205 | 1210 | 1214 | 1220 | 1229 | 1230 | 1238 | 1239 |     |
|           | 1241 | 1242 | 1245 | 1246 | 1273 | 1275 | 1283 | 1287 | 1289 | 1289 | 1303 |     |
|           | 1339 | 1342 | 1346 | 1350 | 1354 | 1357 | 1360 | 1373 | 1375 | 1394 | 1397 |     |
|           | 1400 | 1402 | 1408 | 1410 | 1412 | 1413 | 1413 | 1414 | 1416 | 1416 | 1416 |     |
|           | 1417 | 1418 | 1421 | 1424 | 1435 | 1435 | 1436 | 1442 | 1443 | 1443 | 1448 |     |
|           | 1470 | 1474 | 1479 | 1484 | 1488 | 1488 | 1500 | 1501 | 1501 | 1502 | 1503 |     |
|           | 1505 | 1506 | 1506 | 1506 | 1507 | 1508 | 1508 | 1510 | 1511 | 1511 | 1512 |     |
|           | 1513 | 1513 | 1514 | 1518 | 1522 | 1522 | 1523 | 1523 | 1524 | 1525 | 1525 |     |
|           | 1525 | 1526 | 1528 | 1529 | 1530 | 1530 | 1531 | 1535 | 1538 | 1539 | 1544 |     |
|           | 1545 | 1552 | 1554 | 1613 | 1641 | 1663 | 1664 | 3026 | 3044 | 3045 | 3045 |     |
|           | 3045 | 3046 | 3047 | 3048 | 3050 | 3050 | 3050 | 3052 | 3053 | 3053 | 3055 |     |
|           | 3055 | 3056 | 3056 | 3058 | 3061 | 3065 | 3084 | 3094 | 3104 | 3117 | 3119 |     |
|           | 3119 | 3120 | 3120 | 3121 | 3122 | 3122 | 3123 | 3124 | 3124 | 3125 | 3125 |     |
|           | 3126 | 3127 | 3127 | 3128 | 3129 | 3129 | 3132 | 3133 | 3133 | 3134 | 3134 |     |
|           | 3134 | 3135 | 3136 | 3137 | 3141 | 3142 | 3143 | 3143 | 3147 | 3147 | 3150 |     |
|           | 3153 | 3187 | 3189 | 3191 | 3199 | 3213 | 3220 | 3228 | 3239 | 3241 | 3248 |     |
|           | 3263 | 3269 | 3276 |      |      |      |      |      |      |      |      |     |

**Table S7.** The energies (with ZPE correction), enthalpies and free energies (in au at 298K) and corresponding relative values (in kcal/mol) for **2'**+PhC<sub>2</sub>Me, obtained with B3PW91-PCM method

| Species          | E                   | H                   | G                   |
|------------------|---------------------|---------------------|---------------------|
| <b>2'</b>        | -2349.159052        | -2349.106058        | -2349.222640        |
| <b>PhCCMe</b>    | -347.441330         | -347.432017         | -347.461270         |
| <b>2'+PhCCMe</b> | -2696.600382(0.0)   | -2696.538075(0.0)   | -2696.683910(0.0)   |
| <b>TS4a</b>      | -2696.581665(11.7)  | -2696.519131(11.9)  | -2696.654360(18.5)  |
| <b>4a</b>        | -2696.644418(-27.6) | -2696.582465(-27.9) | -2696.715570(-19.9) |
| <b>TS4b</b>      | -2696.576494(15.0)  | -2696.513684(15.3)  | -2696.647910(22.6)  |
| <b>4b</b>        | -2696.637640(-23.4) | -2696.575530(-23.5) | -2696.708710(-15.6) |

<sup>a</sup> : The relative energies in parentheses are with respect to the corresponding energies of **2'**+ PhCCMe.

**Table S8.** The optimized Cartesian Coordinates (in Å) of stationary points for **2'**+Ph<sub>2</sub>C<sub>4</sub>, obtained with B3PW91-PCM method.

| Species   | Cartesian coordinates |           |           |           |
|-----------|-----------------------|-----------|-----------|-----------|
| <b>2'</b> | C                     | 8.070957  | 13.133265 | 14.745395 |
|           | C                     | 6.814200  | 13.113977 | 15.410977 |
|           | H                     | 5.879366  | 12.786719 | 14.974662 |
|           | C                     | 6.960762  | 13.620901 | 16.729691 |
|           | C                     | 8.342354  | 13.922118 | 16.894047 |
|           | H                     | 8.794292  | 14.364073 | 17.774753 |
|           | C                     | 9.015817  | 13.640394 | 15.677103 |
|           | H                     | 10.065997 | 13.820259 | 15.483502 |
|           | C                     | 8.304934  | 12.811050 | 13.272321 |
|           | C                     | 9.799531  | 12.829592 | 12.923422 |
|           | H                     | 10.250450 | 13.806942 | 13.128417 |
|           | H                     | 9.937821  | 12.617107 | 11.856915 |
|           | H                     | 10.363025 | 12.071378 | 13.483061 |
|           | C                     | 7.726235  | 11.433908 | 12.901523 |
|           | H                     | 8.236761  | 10.614095 | 13.429042 |
|           | H                     | 7.848233  | 11.244648 | 11.827780 |
|           | H                     | 6.659510  | 11.364200 | 13.136762 |
|           | C                     | 7.592837  | 13.887816 | 12.427796 |
|           | H                     | 6.514408  | 13.890970 | 12.619810 |
|           | H                     | 7.747331  | 13.702371 | 11.357212 |
|           | H                     | 7.979973  | 14.885974 | 12.661882 |
|           | C                     | 5.852213  | 13.987266 | 17.710105 |
|           | C                     | 5.731441  | 15.525886 | 17.726893 |
|           | H                     | 6.662443  | 15.996371 | 18.063858 |
|           | H                     | 4.927502  | 15.838047 | 18.405622 |
|           | H                     | 5.501637  | 15.911711 | 16.726995 |
|           | C                     | 6.184032  | 13.501470 | 19.131156 |
|           | H                     | 6.230588  | 12.405278 | 19.163476 |
|           | H                     | 5.407645  | 13.822382 | 19.836621 |
|           | H                     | 7.139733  | 13.904748 | 19.488012 |
|           | C                     | 4.506817  | 13.389389 | 17.280457 |
|           | H                     | 4.186422  | 13.783371 | 16.308588 |
|           | H                     | 3.731789  | 13.649270 | 18.011575 |
|           | H                     | 4.565735  | 12.297668 | 17.209349 |
|           | C                     | 11.023388 | 11.375170 | 18.006437 |
|           | C                     | 10.932364 | 10.047104 | 17.507984 |
|           | H                     | 11.595200 | 9.618005  | 16.762501 |
|           | C                     | 9.956984  | 9.310276  | 18.238930 |
|           | C                     | 9.380849  | 10.223317 | 19.159920 |
|           | H                     | 8.598719  | 9.996150  | 19.875492 |
|           | C                     | 10.019380 | 11.487847 | 19.006140 |
|           | H                     | 9.818138  | 12.363847 | 19.613620 |
| C         | 12.194876             | 12.319466 | 17.755753 |           |
| C         | 11.873605             | 13.770620 | 18.136305 |           |
| H         | 11.084298             | 14.193933 | 17.508676 |           |
| H         | 12.766791             | 14.394800 | 18.013094 |           |
| H         | 11.559486             | 13.852172 | 19.182976 |           |
| C         | 12.672759             | 12.267415 | 16.296410 |           |
| H         | 12.986183             | 11.257445 | 16.009479 |           |
| H         | 13.536466             | 12.928672 | 16.157123 |           |
| H         | 11.891102             | 12.589624 | 15.599818 |           |
| C         | 13.354166             | 11.835428 | 18.657559 |           |
| H         | 13.065219             | 11.863259 | 19.714180 |           |
| H         | 14.235955             | 12.475911 | 18.526265 |           |
| H         | 13.639414             | 10.806050 | 18.413644 |           |
| C         | 9.776605              | 7.797487  | 18.174425 |           |
| C         | 9.556113              | 7.322144  | 16.728525 |           |
| H         | 8.615679              | 7.727258  | 16.330961 |           |

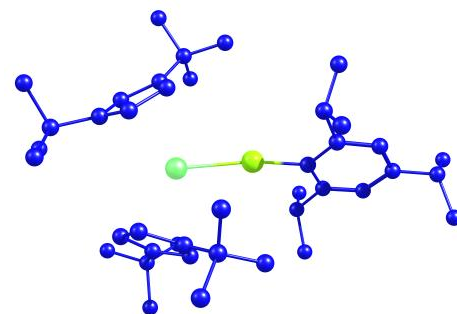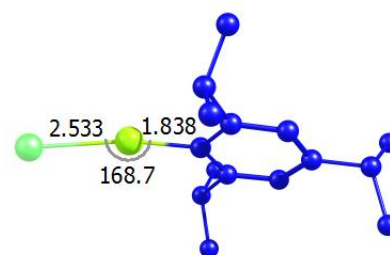

|                 |                                                                                                                                                                                                                                                                                                                                                                                                                                                                                                                                                                                                                                                                                                                                                                                                                                                                                                                                                                                                                                                                                                                                                                                                                                                                                                                                                                                                                                                                                                                                                                                                                                                                                                                                  |  |
|-----------------|----------------------------------------------------------------------------------------------------------------------------------------------------------------------------------------------------------------------------------------------------------------------------------------------------------------------------------------------------------------------------------------------------------------------------------------------------------------------------------------------------------------------------------------------------------------------------------------------------------------------------------------------------------------------------------------------------------------------------------------------------------------------------------------------------------------------------------------------------------------------------------------------------------------------------------------------------------------------------------------------------------------------------------------------------------------------------------------------------------------------------------------------------------------------------------------------------------------------------------------------------------------------------------------------------------------------------------------------------------------------------------------------------------------------------------------------------------------------------------------------------------------------------------------------------------------------------------------------------------------------------------------------------------------------------------------------------------------------------------|--|
|                 | H 9.490775 6.227529 16.690797<br>H 10.382646 7.622487 16.071472<br>C 11.066252 7.149125 18.721392<br>H 11.938607 7.415689 18.113324<br>H 10.973022 6.055639 18.719018<br>H 11.261223 7.472022 19.750647<br>C 8.591787 7.341506 19.033191<br>H 8.739960 7.600097 20.088512<br>H 8.482606 6.252034 18.971995<br>H 7.661789 7.803009 18.683159<br>C 4.537080 9.082728 17.020549<br>C 3.765507 8.825418 15.852164<br>C 2.468778 8.323376 15.974849<br>H 1.898029 8.132904 15.066953<br>C 1.878724 8.059763 17.212751<br>C 2.648608 8.304394 18.348272<br>H 2.211981 8.100308 19.325523<br>C 3.955138 8.797655 18.285439<br>C 4.309030 9.063355 14.451308<br>H 5.307002 9.502559 14.571879<br>C 3.456911 10.064163 13.660147<br>H 2.443793 9.684411 13.478381<br>H 3.910564 10.267985 12.681609<br>H 3.363415 11.014249 14.198335<br>C 4.475933 7.746232 13.681504<br>H 5.123807 7.051555 14.228033<br>H 4.923581 7.926921 12.695708<br>H 3.511507 7.247649 13.522090<br>C 0.459794 7.532597 17.328847<br>H 0.255313 7.392064 18.399906<br>C 0.293768 6.167532 16.646373<br>H 0.466012 6.240275 15.565641<br>H -0.721581 5.779652 16.795587<br>H 1.002441 5.434985 17.048506<br>C -0.567308 8.540860 16.793526<br>H -0.478701 9.505460 17.305664<br>H -1.589576 8.169266 16.937479<br>H -0.424889 8.718518 15.720616<br>C 4.699150 9.004553 19.596288<br>H 5.706339 9.354593 19.336867<br>C 4.850734 7.694539 20.381275<br>H 3.878666 7.295904 20.697214<br>H 5.450901 7.855418 21.285882<br>H 5.345640 6.926479 19.777025<br>C 4.039481 10.087837 20.460244<br>H 3.968943 11.036637 19.917360<br>H 4.619384 10.260051 21.376167<br>H 3.024372 9.799091 20.760404<br>P 6.237509 9.769065 16.890442<br>Th 8.353830 11.155126 16.767561 |  |
| <b>PhCCCCPh</b> | C 0.614178 -1.130670 -3.528580<br>C 0.614164 -1.130391 -2.305881<br>C 0.614176 -1.130516 -0.886307<br>C -0.600360 -1.130574 -0.172356<br>C 1.828723 -1.130575 -0.172376<br>C -0.594099 -1.130690 1.217947<br>C 1.822485 -1.130691 1.217928<br>C 0.614199 -1.130749 1.917120<br>H -1.537793 -1.130526 -0.720532<br>H 2.766147 -1.130528 -0.720567<br>H -1.536646 -1.130734 1.758969<br>H 2.765041 -1.130735 1.758933                                                                                                                                                                                                                                                                                                                                                                                                                                                                                                                                                                                                                                                                                                                                                                                                                                                                                                                                                                                                                                                                                                                                                                                                                                                                                                              |  |



|              |                                                                                                                                                                                                                                                                                                                                                                                                                                                                                                                                                                                                                                                                                                                                                                                                                                                                                                                                                                                                                                                                                                                                                                                                                                                                                                                                                                                                                                                                                                                                                                                                                                                                                                                    |  |
|--------------|--------------------------------------------------------------------------------------------------------------------------------------------------------------------------------------------------------------------------------------------------------------------------------------------------------------------------------------------------------------------------------------------------------------------------------------------------------------------------------------------------------------------------------------------------------------------------------------------------------------------------------------------------------------------------------------------------------------------------------------------------------------------------------------------------------------------------------------------------------------------------------------------------------------------------------------------------------------------------------------------------------------------------------------------------------------------------------------------------------------------------------------------------------------------------------------------------------------------------------------------------------------------------------------------------------------------------------------------------------------------------------------------------------------------------------------------------------------------------------------------------------------------------------------------------------------------------------------------------------------------------------------------------------------------------------------------------------------------|--|
|              | H 0.614207 -1.130840 3.003846<br>C 0.614146 -1.130692 -4.886690<br>C 0.614119 -1.130713 -6.109389<br>C 0.614148 -1.130692 -7.528964<br>C 1.828704 -1.130683 -8.242879<br>C -0.600378 -1.130682 -8.242928<br>C 1.822483 -1.130665 -9.633183<br>C -0.594101 -1.130664 -9.633232<br>C 0.614205 -1.130655 -10.332389<br>H 2.766121 -1.130692 -7.694676<br>H -1.537818 -1.130690 -7.694764<br>H 2.765046 -1.130658 -10.174177<br>H -1.536641 -1.130656 -10.174264<br>H 0.614227 -1.130640 -11.419116                                                                                                                                                                                                                                                                                                                                                                                                                                                                                                                                                                                                                                                                                                                                                                                                                                                                                                                                                                                                                                                                                                                                                                                                                    |  |
| <b>TS7a1</b> | C 9.470291 13.318110 13.536497<br>C 8.488378 13.623643 14.515450<br>H 7.426288 13.447847 14.408734<br>C 9.098839 14.255116 15.633395<br>C 10.492382 14.292922 15.357764<br>H 11.243592 14.749821 15.988146<br>C 10.723672 13.720143 14.080321<br>H 11.684394 13.662662 13.581684<br>C 9.184869 12.920219 12.092997<br>C 10.453721 12.441019 11.375730<br>H 11.219456 13.225202 11.348255<br>H 10.218191 12.174370 10.338287<br>H 10.885902 11.556736 11.856723<br>C 8.107516 11.829577 12.002731<br>H 8.427608 10.901179 12.487805<br>H 7.887706 11.601949 10.951963<br>H 7.172787 12.148846 12.474926<br>C 8.667565 14.180714 11.365237<br>H 7.741040 14.546757 11.821241<br>H 8.463922 13.957559 10.309783<br>H 9.406559 14.989110 11.407479<br>C 8.409510 15.006239 16.768317<br>C 8.539646 16.515676 16.469089<br>H 9.589814 16.827922 16.435708<br>H 8.034490 17.103841 17.246149<br>H 8.083318 16.763669 15.503741<br>C 9.074221 14.716150 18.123058<br>H 9.002860 13.650795 18.374594<br>H 8.579421 15.286496 18.919296<br>H 10.132192 15.003818 18.123343<br>C 6.920450 14.654967 16.857564<br>H 6.389253 14.942354 15.942644<br>H 6.457427 15.199362 17.689637<br>H 6.775048 13.582424 17.021854<br>C 12.899816 11.882445 16.670705<br>C 12.659741 10.482182 16.653897<br>H 13.198335 9.769635 16.038086<br>C 11.718468 10.129531 17.661952<br>C 11.305200 11.349405 18.260517<br>H 10.598446 11.455397 19.075196<br>C 12.018669 12.417586 17.648886<br>H 11.953068 13.455436 17.951699<br>C 14.113051 12.558354 16.037203<br>C 14.000823 14.087812 15.997468<br>H 13.236437 14.423484 15.291233<br>H 14.956007 14.519276 15.674528<br>H 13.771713 14.507299 16.983781<br>C 14.378116 12.042861 14.616707 |  |

|   |           |           |           |
|---|-----------|-----------|-----------|
| H | 14.562282 | 10.964252 | 14.603493 |
| H | 15.264350 | 12.531234 | 14.193233 |
| H | 13.532172 | 12.245171 | 13.950331 |
| C | 15.329567 | 12.195969 | 16.920567 |
| H | 15.193999 | 12.564332 | 17.943829 |
| H | 16.246240 | 12.642788 | 16.513886 |
| H | 15.470996 | 11.110667 | 16.969696 |
| C | 11.499574 | 8.715747  | 18.192526 |
| C | 11.246190 | 7.707376  | 17.062850 |
| H | 10.301592 | 7.915269  | 16.550229 |
| H | 11.189912 | 6.689609  | 17.469128 |
| H | 12.047665 | 7.721075  | 16.315226 |
| C | 12.791339 | 8.305193  | 18.933805 |
| H | 13.650796 | 8.283553  | 18.253819 |
| H | 12.678248 | 7.305047  | 19.372019 |
| H | 13.019083 | 9.008665  | 19.742891 |
| C | 10.332106 | 8.659642  | 19.183361 |
| H | 10.515031 | 9.298702  | 20.055290 |
| H | 10.199539 | 7.633818  | 19.548468 |
| H | 9.400097  | 8.983204  | 18.708807 |
| C | 14.205437 | 10.414852 | 11.013821 |
| H | 13.398021 | 11.061288 | 10.683736 |
| C | 15.457919 | 10.488425 | 10.415007 |
| H | 15.627981 | 11.200672 | 9.612109  |
| C | 16.492269 | 9.652680  | 10.839829 |
| H | 17.469402 | 9.714095  | 10.368426 |
| C | 16.269632 | 8.736485  | 11.869463 |
| H | 17.071903 | 8.082428  | 12.200106 |
| C | 15.021539 | 8.653115  | 12.475826 |
| H | 14.842037 | 7.938162  | 13.273330 |
| C | 13.972147 | 9.494921  | 12.055097 |
| C | 12.693773 | 9.399564  | 12.664021 |
| C | 11.584642 | 9.272974  | 13.169870 |
| C | 10.339141 | 9.008702  | 13.646602 |
| C | 9.238667  | 8.595891  | 14.021291 |
| C | 8.064196  | 7.785276  | 14.112829 |
| C | 7.615274  | 7.160583  | 12.930859 |
| H | 8.120443  | 7.371055  | 11.992782 |
| C | 6.543374  | 6.276161  | 12.971409 |
| H | 6.203346  | 5.803011  | 12.054059 |
| C | 5.912007  | 5.994207  | 14.184017 |
| H | 5.076411  | 5.299854  | 14.213585 |
| C | 6.349524  | 6.613072  | 15.356257 |
| H | 5.852737  | 6.406911  | 16.300176 |
| C | 7.412011  | 7.510341  | 15.325927 |
| H | 7.734142  | 8.027720  | 16.223976 |
| C | 6.063602  | 10.763741 | 17.244954 |
| C | 4.975481  | 10.862057 | 16.328483 |
| C | 3.663690  | 10.780300 | 16.800659 |
| H | 2.849837  | 10.853482 | 16.080869 |
| C | 3.356492  | 10.618953 | 18.152460 |
| C | 4.426963  | 10.540756 | 19.040863 |
| H | 4.213324  | 10.424207 | 20.102928 |
| C | 5.760105  | 10.604788 | 18.626117 |
| C | 5.169145  | 11.076021 | 14.833750 |
| H | 6.250505  | 11.125835 | 14.657118 |
| C | 4.553259  | 12.405090 | 14.372122 |
| H | 3.462169  | 12.405229 | 14.487434 |
| H | 4.768804  | 12.583417 | 13.310593 |
| H | 4.944903  | 13.249353 | 14.949297 |
| C | 4.613014  | 9.913303  | 14.001474 |
| H | 5.059614  | 8.960373  | 14.300015 |

|           |    |           |           |           |  |
|-----------|----|-----------|-----------|-----------|--|
|           | H  | 4.824477  | 10.069742 | 12.936119 |  |
|           | H  | 3.524646  | 9.824455  | 14.111453 |  |
|           | C  | 1.922508  | 10.538802 | 18.644203 |  |
|           | H  | 1.962985  | 10.411374 | 19.735408 |  |
|           | C  | 1.187105  | 9.321698  | 18.065550 |  |
|           | H  | 1.105102  | 9.390701  | 16.974077 |  |
|           | H  | 0.170650  | 9.251624  | 18.472399 |  |
|           | H  | 1.715231  | 8.391150  | 18.301886 |  |
|           | C  | 1.147006  | 11.833324 | 18.360981 |  |
|           | H  | 1.649623  | 12.700461 | 18.803561 |  |
|           | H  | 0.132515  | 11.777153 | 18.774992 |  |
|           | H  | 1.057019  | 12.014345 | 17.283010 |  |
|           | C  | 6.835378  | 10.511379 | 19.697998 |  |
|           | H  | 7.802648  | 10.555917 | 19.183300 |  |
|           | C  | 6.772615  | 9.179442  | 20.457297 |  |
|           | H  | 5.834145  | 9.073996  | 21.015822 |  |
|           | H  | 7.596385  | 9.107451  | 21.178291 |  |
|           | H  | 6.848561  | 8.329428  | 19.769757 |  |
|           | C  | 6.775465  | 11.701202 | 20.665514 |  |
|           | H  | 6.862898  | 12.651130 | 20.126665 |  |
|           | H  | 7.592754  | 11.646390 | 21.396091 |  |
|           | H  | 5.831800  | 11.720322 | 21.224969 |  |
|           | P  | 7.812342  | 10.826632 | 16.672322 |  |
|           | Th | 10.073448 | 11.598252 | 15.795205 |  |
| <b>9a</b> | C  | 9.569307  | 14.112558 | 14.007827 |  |
|           | C  | 8.525246  | 14.237626 | 14.968680 |  |
|           | H  | 7.499802  | 13.928589 | 14.815950 |  |
|           | C  | 9.014861  | 14.890747 | 16.134645 |  |
|           | C  | 10.393746 | 15.132233 | 15.911260 |  |
|           | H  | 11.073956 | 15.629553 | 16.593577 |  |
|           | C  | 10.734392 | 14.651152 | 14.619905 |  |
|           | H  | 11.705659 | 14.755649 | 14.150481 |  |
|           | C  | 9.408048  | 13.766762 | 12.530758 |  |
|           | C  | 10.691440 | 13.174232 | 11.932811 |  |
|           | H  | 11.545463 | 13.852973 | 12.040117 |  |
|           | H  | 10.552955 | 12.996718 | 10.859263 |  |
|           | H  | 10.944196 | 12.214209 | 12.396935 |  |
|           | C  | 8.260869  | 12.776474 | 12.297584 |  |
|           | H  | 8.443208  | 11.830553 | 12.818679 |  |
|           | H  | 8.164088  | 12.562261 | 11.226287 |  |
|           | H  | 7.302648  | 13.181456 | 12.639036 |  |
|           | C  | 9.082083  | 15.083735 | 11.791473 |  |
|           | H  | 8.162621  | 15.535713 | 12.180820 |  |
|           | H  | 8.943219  | 14.896302 | 10.718893 |  |
|           | H  | 9.892307  | 15.812799 | 11.908116 |  |
|           | C  | 8.215820  | 15.359203 | 17.346294 |  |
|           | C  | 8.210095  | 16.901317 | 17.350207 |  |
|           | H  | 9.225618  | 17.304657 | 17.433750 |  |
|           | H  | 7.623353  | 17.280464 | 18.196683 |  |
|           | H  | 7.768111  | 17.291428 | 16.426368 |  |
|           | C  | 8.853771  | 14.863876 | 18.657303 |  |
|           | H  | 8.812644  | 13.767614 | 18.734194 |  |
|           | H  | 8.312840  | 15.265679 | 19.523110 |  |
|           | H  | 9.900603  | 15.177628 | 18.744773 |  |
|           | C  | 6.766087  | 14.861477 | 17.284998 |  |
|           | H  | 6.248084  | 15.252604 | 16.401763 |  |
|           | H  | 6.214229  | 15.201659 | 18.169360 |  |
|           | H  | 6.716923  | 13.766593 | 17.254807 |  |
|           | C  | 13.203895 | 12.275196 | 16.436781 |  |
|           | C  | 12.747090 | 10.967082 | 16.764553 |  |
|           | H  | 12.992749 | 10.067274 | 16.212043 |  |
|           | C  | 12.034088 | 11.003767 | 17.995266 |  |

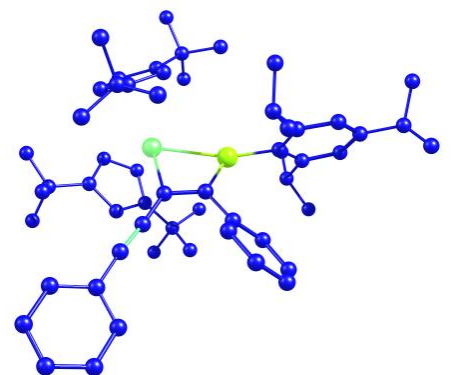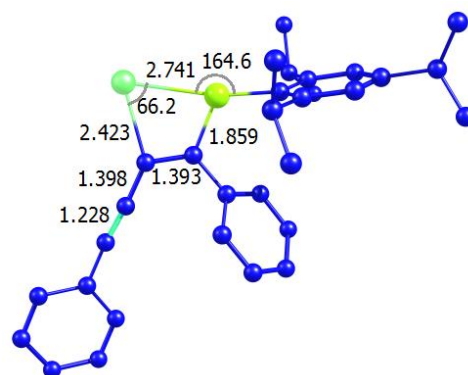

|   |           |           |           |
|---|-----------|-----------|-----------|
| C | 11.969398 | 12.369928 | 18.378695 |
| H | 11.503530 | 12.759576 | 19.277773 |
| C | 12.687455 | 13.143831 | 17.430125 |
| H | 12.859631 | 14.211046 | 17.496275 |
| C | 14.270127 | 12.603365 | 15.395761 |
| C | 14.597033 | 14.103090 | 15.388518 |
| H | 13.716749 | 14.714830 | 15.161371 |
| H | 15.356415 | 14.317054 | 14.627141 |
| H | 14.995298 | 14.430295 | 16.355987 |
| C | 13.850273 | 12.166368 | 13.985504 |
| H | 13.553643 | 11.112636 | 13.957419 |
| H | 14.679373 | 12.306308 | 13.279986 |
| H | 13.005177 | 12.759964 | 13.621678 |
| C | 15.552936 | 11.837445 | 15.785670 |
| H | 15.876407 | 12.102487 | 16.798808 |
| H | 16.366963 | 12.081806 | 15.091247 |
| H | 15.395409 | 10.754011 | 15.752985 |
| C | 11.698366 | 9.799563  | 18.865676 |
| C | 11.108557 | 8.644640  | 18.045285 |
| H | 10.151336 | 8.929165  | 17.597387 |
| H | 10.941622 | 7.772330  | 18.689548 |
| H | 11.779385 | 8.335128  | 17.236431 |
| C | 13.020472 | 9.324364  | 19.508417 |
| H | 13.742467 | 9.016601  | 18.743839 |
| H | 12.836611 | 8.466625  | 20.168204 |
| H | 13.478174 | 10.122499 | 20.104453 |
| C | 10.724069 | 10.178907 | 19.988112 |
| H | 11.153924 | 10.931094 | 20.660136 |
| H | 10.485860 | 9.296383  | 20.593811 |
| H | 9.785982  | 10.574400 | 19.583511 |
| C | 13.497877 | 8.780412  | 11.492660 |
| H | 13.681772 | 9.849703  | 11.544346 |
| C | 14.275629 | 7.974449  | 10.667664 |
| H | 15.070748 | 8.421836  | 10.075894 |
| C | 14.042413 | 6.599774  | 10.597772 |
| H | 14.654118 | 5.972515  | 9.954418  |
| C | 13.016670 | 6.036754  | 11.360067 |
| H | 12.826580 | 4.967119  | 11.311205 |
| C | 12.231621 | 6.835356  | 12.184186 |
| H | 11.431367 | 6.399623  | 12.775436 |
| C | 12.459515 | 8.226040  | 12.269354 |
| C | 11.655379 | 9.030732  | 13.120416 |
| C | 10.887051 | 9.632511  | 13.865678 |
| C | 10.088428 | 10.392806 | 14.724814 |
| C | 8.892256  | 9.936530  | 15.273308 |
| C | 8.319639  | 8.611210  | 14.904762 |
| C | 8.234349  | 8.228474  | 13.555793 |
| H | 8.557083  | 8.922360  | 12.786268 |
| C | 7.732954  | 6.978883  | 13.197843 |
| H | 7.666909  | 6.708680  | 12.146678 |
| C | 7.319444  | 6.078507  | 14.180221 |
| H | 6.933031  | 5.101432  | 13.900999 |
| C | 7.403441  | 6.443926  | 15.523429 |
| H | 7.086874  | 5.750246  | 16.298586 |
| C | 7.886924  | 7.700233  | 15.880460 |
| H | 7.948037  | 7.975759  | 16.928717 |
| C | 6.269401  | 10.395511 | 16.824714 |
| C | 5.274980  | 10.587186 | 15.829012 |
| C | 3.950450  | 10.245630 | 16.112655 |
| H | 3.202651  | 10.390345 | 15.335792 |
| C | 3.548842  | 9.750747  | 17.352757 |
| C | 4.532089  | 9.591191  | 18.325466 |

|              |                                  |  |
|--------------|----------------------------------|--|
|              | H 4.238305 9.215107 19.303320    |  |
|              | C 5.878592 9.888769 18.093806    |  |
|              | C 5.554949 11.196611 14.464854   |  |
|              | H 6.631955 11.382590 14.399426   |  |
|              | C 4.838705 12.548664 14.321506   |  |
|              | H 3.749254 12.428905 14.359901   |  |
|              | H 5.083002 13.016287 13.359978   |  |
|              | H 5.122554 13.238933 15.123329   |  |
|              | C 5.167572 10.261072 13.311772   |  |
|              | H 5.663070 9.290156 13.401284    |  |
|              | H 5.456847 10.705522 12.351572   |  |
|              | H 4.084774 10.088591 13.280027   |  |
|              | C 2.098661 9.410355 17.644531    |  |
|              | H 2.055870 9.045649 18.680410    |  |
|              | C 1.583607 8.284806 16.736684    |  |
|              | H 1.583339 8.591802 15.683962    |  |
|              | H 0.555207 8.013682 17.004576    |  |
|              | H 2.207668 7.388573 16.822891    |  |
|              | C 1.195501 10.648726 17.553624   |  |
|              | H 1.541698 11.442318 18.225081   |  |
|              | H 0.164002 10.395093 17.826561   |  |
|              | H 1.179778 11.055486 16.535320   |  |
|              | C 6.853931 9.688303 19.244263    |  |
|              | H 7.862300 9.704006 18.812494    |  |
|              | C 6.683880 8.344927 19.965033    |  |
|              | H 5.745792 8.290713 20.530157    |  |
|              | H 7.500891 8.200829 20.681948    |  |
|              | H 6.698490 7.505790 19.260679    |  |
|              | C 6.763452 10.854734 20.239193   |  |
|              | H 6.961902 11.813026 19.745657   |  |
|              | H 7.489640 10.731020 21.052040   |  |
|              | H 5.763208 10.912034 20.686461   |  |
|              | P 8.023727 10.919074 16.591139   |  |
|              | Th 10.316746 12.349933 16.134552 |  |
| <b>TS7a2</b> | C 8.883742 12.486017 12.972842   |  |
|              | C 7.743427 12.410706 13.819554   |  |
|              | H 6.801874 11.945492 13.556645   |  |
|              | C 7.986178 13.140707 15.025095   |  |
|              | C 9.315059 13.616585 14.940992   |  |
|              | H 9.817045 14.225654 15.681259   |  |
|              | C 9.873882 13.199454 13.704686   |  |
|              | H 10.856163 13.474813 13.337961  |  |
|              | C 8.943219 12.158829 11.484485   |  |
|              | C 10.385686 11.933091 11.009459  |  |
|              | H 11.014170 12.815302 11.178266  |  |
|              | H 10.394686 11.731044 9.931694   |  |
|              | H 10.845057 11.075057 11.511822  |  |
|              | C 8.103143 10.925982 11.130892   |  |
|              | H 8.457945 10.036019 11.660646   |  |
|              | H 8.157984 10.731484 10.052931   |  |
|              | H 7.048633 11.075130 11.383953   |  |
|              | C 8.366094 13.379675 10.733659   |  |
|              | H 7.328636 13.570586 11.030915   |  |
|              | H 8.384399 13.203905 9.650376    |  |
|              | H 8.949618 14.283814 10.942483   |  |
|              | C 6.955089 13.497824 16.092522   |  |
|              | C 5.814858 14.284838 15.415444   |  |
|              | H 6.199136 15.185531 14.923233   |  |
|              | H 5.069273 14.591855 16.159537   |  |
|              | H 5.305361 13.678666 14.658802   |  |
|              | C 7.576779 14.389093 17.176970   |  |
|              | H 8.401847 13.885325 17.694265   |  |
|              |                                  |  |

|   |           |           |           |
|---|-----------|-----------|-----------|
| H | 6.821149  | 14.643408 | 17.929287 |
| H | 7.959448  | 15.326741 | 16.757840 |
| C | 6.364860  | 12.244841 | 16.759249 |
| H | 5.907671  | 11.571534 | 16.027105 |
| H | 5.594675  | 12.529175 | 17.487425 |
| H | 7.134952  | 11.675861 | 17.299772 |
| C | 11.815546 | 11.402775 | 16.988002 |
| C | 11.996199 | 10.030954 | 16.648367 |
| H | 12.853426 | 9.634544  | 16.114159 |
| C | 10.976200 | 9.239544  | 17.242636 |
| C | 10.087630 | 10.154045 | 17.874157 |
| H | 9.197654  | 9.891267  | 18.434529 |
| C | 10.606084 | 11.469411 | 17.731179 |
| H | 10.171470 | 12.364042 | 18.163315 |
| C | 12.888474 | 12.479291 | 16.845968 |
| C | 12.401016 | 13.838995 | 17.360936 |
| H | 11.540256 | 14.205694 | 16.793593 |
| H | 13.200847 | 14.583005 | 17.268235 |
| H | 12.116090 | 13.788727 | 18.417950 |
| C | 13.367894 | 12.624127 | 15.393423 |
| H | 13.719006 | 11.668184 | 14.988762 |
| H | 14.201921 | 13.334549 | 15.334298 |
| H | 12.568784 | 12.999563 | 14.743630 |
| C | 14.091430 | 12.046650 | 17.713733 |
| H | 13.790680 | 11.911459 | 18.758746 |
| H | 14.879779 | 12.809451 | 17.679801 |
| H | 14.518541 | 11.102026 | 17.360408 |
| C | 11.074747 | 7.734458  | 17.483572 |
| C | 11.490378 | 6.960437  | 16.225251 |
| H | 10.714276 | 7.007638  | 15.456668 |
| H | 11.660091 | 5.906084  | 16.477206 |
| H | 12.417787 | 7.350496  | 15.791783 |
| C | 12.167586 | 7.540038  | 18.560754 |
| H | 13.141050 | 7.902195  | 18.211175 |
| H | 12.268967 | 6.475427  | 18.807826 |
| H | 11.915498 | 8.080973  | 19.480454 |
| C | 9.763399  | 7.152211  | 18.022069 |
| H | 9.474727  | 7.621840  | 18.970268 |
| H | 9.885257  | 6.078737  | 18.211645 |
| H | 8.946063  | 7.285498  | 17.305227 |
| C | 13.903464 | 10.098895 | 12.208646 |
| H | 13.480715 | 11.052060 | 12.513140 |
| C | 15.181605 | 10.045274 | 11.662743 |
| H | 15.754850 | 10.962588 | 11.551648 |
| C | 15.727506 | 8.826758  | 11.256141 |
| H | 16.726654 | 8.788280  | 10.830389 |
| C | 14.977065 | 7.657239  | 11.400326 |
| H | 15.391949 | 6.702497  | 11.085998 |
| C | 13.699084 | 7.700153  | 11.944265 |
| H | 13.118421 | 6.788970  | 12.056097 |
| C | 13.132992 | 8.926347  | 12.362998 |
| C | 11.825456 | 8.956312  | 12.914085 |
| C | 10.663540 | 8.717431  | 13.292190 |
| C | 9.437284  | 8.804771  | 13.901362 |
| C | 8.255212  | 8.094283  | 14.035210 |
| C | 7.894022  | 6.893060  | 13.258896 |
| C | 8.449605  | 6.671313  | 11.986497 |
| H | 9.128906  | 7.408946  | 11.569024 |
| C | 8.133970  | 5.526936  | 11.260284 |
| H | 8.569185  | 5.376470  | 10.275247 |
| C | 7.262794  | 4.574923  | 11.792857 |
| H | 7.018839  | 3.679446  | 11.226609 |

|   |                                 |  |
|---|---------------------------------|--|
|   | C 6.708733 4.778671 13.057641   |  |
|   | H 6.034366 4.039312 13.482768   |  |
|   | C 7.016687 5.927419 13.781029   |  |
|   | H 6.587333 6.081438 14.766391   |  |
|   | C 5.568735 8.539931 15.470593   |  |
|   | C 4.701221 8.734982 14.360192   |  |
|   | C 3.346442 8.409946 14.477687   |  |
|   | H 2.704626 8.551257 13.610000   |  |
|   | C 2.783355 7.932098 15.660471   |  |
|   | C 3.630721 7.800396 16.757150   |  |
|   | H 3.211866 7.447776 17.698422   |  |
|   | C 4.997132 8.090040 16.694940   |  |
|   | C 5.143128 9.347272 13.038814   |  |
|   | H 6.215771 9.554265 13.111044   |  |
|   | C 4.416070 10.681165 12.800284  |  |
|   | H 3.338653 10.528310 12.666353  |  |
|   | H 4.790306 11.173224 11.893922  |  |
|   | H 4.544140 11.368306 13.644456  |  |
|   | C 4.924466 8.410260 11.842479   |  |
|   | H 5.426684 7.450109 11.987239   |  |
|   | H 5.317123 8.866443 10.925524   |  |
|   | H 3.857415 8.213153 11.680243   |  |
|   | C 1.309672 7.583427 15.763539   |  |
|   | H 1.132743 7.234816 16.790879   |  |
|   | C 0.927820 6.437776 14.815814   |  |
|   | H 1.069031 6.725750 13.767145   |  |
|   | H -0.125637 6.161814 14.946885  |  |
|   | H 1.539837 5.548426 15.002623   |  |
|   | C 0.414952 8.809538 15.533753   |  |
|   | H 0.663765 9.617840 16.230380   |  |
|   | H -0.641258 8.549413 15.674470  |  |
|   | H 0.528459 9.199079 14.514975   |  |
|   | C 5.800809 7.888416 17.975025   |  |
|   | H 6.834004 8.185357 17.764573   |  |
|   | C 5.836472 6.412337 18.393258   |  |
|   | H 4.833034 6.031693 18.620089   |  |
|   | H 6.453802 6.281526 19.290493   |  |
|   | H 6.259886 5.788452 17.598064   |  |
|   | C 5.290551 8.775980 19.118505   |  |
|   | H 5.290639 9.833394 18.830759   |  |
|   | H 5.929272 8.662760 20.003441   |  |
|   | H 4.268028 8.512887 19.415437   |  |
|   | P 7.410611 8.798237 15.459093   |  |
|   | Th 9.651993 10.811234 15.173128 |  |
| 7 | C 9.057955 12.306606 12.749552  |  |
|   | C 7.924135 12.251833 13.607971  |  |
|   | H 6.962733 11.830012 13.342348  |  |
|   | C 8.197747 12.953235 14.819746  |  |
|   | C 9.550595 13.366423 14.738439  |  |
|   | H 10.081337 13.953072 15.475941 |  |
|   | C 10.079267 12.961507 13.481587 |  |
|   | H 11.074609 13.187009 13.117689 |  |
|   | C 9.068391 12.005821 11.254711  |  |
|   | C 10.496293 11.936036 10.697413 |  |
|   | H 11.028879 12.885160 10.830112 |  |
|   | H 10.464527 11.728525 9.621027  |  |
|   | H 11.078207 11.144679 11.179090 |  |
|   | C 8.330767 10.703196 10.919008  |  |
|   | H 8.813471 9.836550 11.380442   |  |
|   | H 8.317073 10.548579 9.833018   |  |
|   | H 7.290519 10.733014 11.259257  |  |
|   | C 8.333735 13.175526 10.561292  |  |

|   |           |           |           |
|---|-----------|-----------|-----------|
| H | 7.294966  | 13.249495 | 10.902629 |
| H | 8.326417  | 13.027648 | 9.473678  |
| H | 8.827502  | 14.131189 | 10.772375 |
| C | 7.168863  | 13.353490 | 15.874011 |
| C | 6.041867  | 14.139473 | 15.173811 |
| H | 6.440810  | 15.020269 | 14.657808 |
| H | 5.301756  | 14.479005 | 15.909251 |
| H | 5.521214  | 13.523193 | 14.433529 |
| C | 7.793627  | 14.268726 | 16.935812 |
| H | 8.604936  | 13.770930 | 17.477508 |
| H | 7.034574  | 14.558659 | 17.671823 |
| H | 8.194984  | 15.186340 | 16.490349 |
| C | 6.561830  | 12.124254 | 16.567909 |
| H | 6.110890  | 11.433992 | 15.848000 |
| H | 5.782304  | 12.430426 | 17.277322 |
| H | 7.325064  | 11.573903 | 17.134262 |
| C | 11.667804 | 11.375943 | 17.063377 |
| C | 12.090456 | 10.082925 | 16.636916 |
| H | 13.050601 | 9.863307  | 16.182955 |
| C | 11.147398 | 9.103074  | 17.057079 |
| C | 10.073789 | 9.813555  | 17.654058 |
| H | 9.180015  | 9.374920  | 18.080894 |
| C | 10.388751 | 11.199069 | 17.656498 |
| H | 9.786531  | 11.973017 | 18.117874 |
| C | 12.583749 | 12.593326 | 17.193476 |
| C | 11.859072 | 13.782870 | 17.837678 |
| H | 11.008345 | 14.127345 | 17.242496 |
| H | 12.550918 | 14.626785 | 17.943635 |
| H | 11.489749 | 13.529578 | 18.837930 |
| C | 13.188945 | 13.022435 | 15.849441 |
| H | 13.749565 | 12.202625 | 15.388387 |
| H | 13.882503 | 13.860464 | 15.992948 |
| H | 12.415448 | 13.346177 | 15.144765 |
| C | 13.740113 | 12.192150 | 18.137084 |
| H | 13.356228 | 11.863092 | 19.109371 |
| H | 14.407022 | 13.047561 | 18.304417 |
| H | 14.335527 | 11.375796 | 17.715015 |
| C | 11.423461 | 7.603881  | 17.158235 |
| C | 11.913394 | 6.996680  | 15.836543 |
| H | 11.121138 | 6.992047  | 15.082285 |
| H | 12.230382 | 5.958854  | 15.999416 |
| H | 12.766614 | 7.547261  | 15.425650 |
| C | 12.536510 | 7.430678  | 18.216872 |
| H | 13.468693 | 7.911212  | 17.899116 |
| H | 12.741969 | 6.364611  | 18.378165 |
| H | 12.239140 | 7.869782  | 19.176349 |
| C | 10.184398 | 6.836583  | 17.636676 |
| H | 9.872748  | 7.162293  | 18.636517 |
| H | 10.410660 | 5.764992  | 17.695185 |
| H | 9.338585  | 6.971314  | 16.953171 |
| C | 13.627199 | 10.660979 | 12.840709 |
| H | 13.243678 | 11.598502 | 13.232109 |
| C | 14.919958 | 10.596771 | 12.327681 |
| H | 15.546394 | 11.485777 | 12.333710 |
| C | 15.410619 | 9.399591  | 11.805706 |
| H | 16.421049 | 9.346937  | 11.408492 |
| C | 14.588499 | 8.269361  | 11.793789 |
| H | 14.959622 | 7.331766  | 11.386182 |
| C | 13.294996 | 8.335107  | 12.297769 |
| H | 12.659257 | 7.453167  | 12.283444 |
| C | 12.783584 | 9.533724  | 12.841369 |
| C | 11.435634 | 9.615671  | 13.384386 |

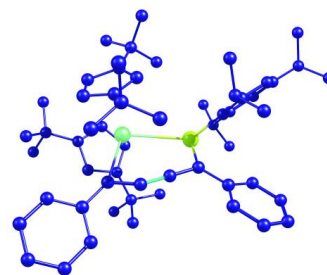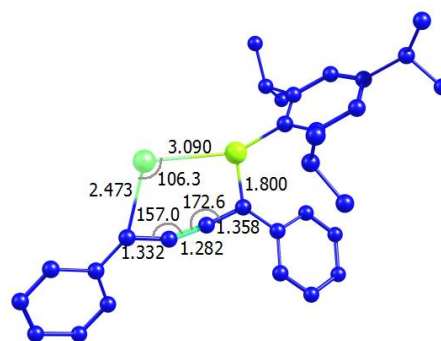



|              |    |           |           |           |  |
|--------------|----|-----------|-----------|-----------|--|
|              | C  | 10.441486 | 8.742623  | 13.234006 |  |
|              | C  | 9.284819  | 8.226419  | 13.431865 |  |
|              | C  | 8.106073  | 7.668486  | 13.809597 |  |
|              | C  | 7.585588  | 6.437060  | 13.190529 |  |
|              | C  | 8.044815  | 6.029012  | 11.925646 |  |
|              | H  | 8.766724  | 6.649929  | 11.400843 |  |
|              | C  | 7.580183  | 4.854296  | 11.344284 |  |
|              | H  | 7.945846  | 4.556600  | 10.364613 |  |
|              | C  | 6.644109  | 4.062608  | 12.013050 |  |
|              | H  | 6.278441  | 3.145748  | 11.557709 |  |
|              | C  | 6.180906  | 4.456581  | 13.269010 |  |
|              | H  | 5.455056  | 3.844493  | 13.798475 |  |
|              | C  | 6.645429  | 5.631690  | 13.853196 |  |
|              | H  | 6.285105  | 5.931686  | 14.832162 |  |
|              | C  | 5.676524  | 8.515988  | 15.399645 |  |
|              | C  | 4.772411  | 8.782151  | 14.334763 |  |
|              | C  | 3.400439  | 8.604957  | 14.537639 |  |
|              | H  | 2.726459  | 8.793096  | 13.703936 |  |
|              | C  | 2.861737  | 8.212698  | 15.762445 |  |
|              | C  | 3.753267  | 8.012123  | 16.812857 |  |
|              | H  | 3.355567  | 7.721976  | 17.784144 |  |
|              | C  | 5.136794  | 8.152443  | 16.665839 |  |
|              | C  | 5.198640  | 9.304699  | 12.969698 |  |
|              | H  | 6.285948  | 9.435969  | 12.989483 |  |
|              | C  | 4.557430  | 10.673999 | 12.689568 |  |
|              | H  | 3.471087  | 10.588570 | 12.569059 |  |
|              | H  | 4.953404  | 11.106702 | 11.762367 |  |
|              | H  | 4.738302  | 11.381721 | 13.505958 |  |
|              | C  | 4.860915  | 8.333489  | 11.829143 |  |
|              | H  | 5.298104  | 7.346006  | 11.996250 |  |
|              | H  | 5.241316  | 8.719184  | 10.875330 |  |
|              | H  | 3.775757  | 8.209579  | 11.725131 |  |
|              | C  | 1.368287  | 8.020857  | 15.954633 |  |
|              | H  | 1.214460  | 7.717165  | 16.999752 |  |
|              | C  | 0.821144  | 6.897953  | 15.062175 |  |
|              | H  | 0.932609  | 7.145310  | 13.999656 |  |
|              | H  | -0.245979 | 6.734963  | 15.256290 |  |
|              | H  | 1.349500  | 5.955219  | 15.242390 |  |
|              | C  | 0.590423  | 9.326095  | 15.735608 |  |
|              | H  | 0.954002  | 10.120469 | 16.396945 |  |
|              | H  | -0.477833 | 9.177431  | 15.934969 |  |
|              | H  | 0.689351  | 9.679692  | 14.702238 |  |
|              | C  | 5.991966  | 7.880856  | 17.899369 |  |
|              | H  | 7.035077  | 8.079785  | 17.628527 |  |
|              | C  | 5.917368  | 6.407342  | 18.322759 |  |
|              | H  | 4.896516  | 6.120649  | 18.603587 |  |
|              | H  | 6.566445  | 6.221862  | 19.187328 |  |
|              | H  | 6.240756  | 5.746679  | 17.510592 |  |
|              | C  | 5.633454  | 8.809014  | 19.067852 |  |
|              | H  | 5.701759  | 9.862801  | 18.775702 |  |
|              | H  | 6.318203  | 8.642874  | 19.908814 |  |
|              | H  | 4.615226  | 8.631339  | 19.434829 |  |
|              | P  | 7.535404  | 8.542301  | 15.276627 |  |
|              | Th | 9.817693  | 10.602679 | 14.972994 |  |
| <b>TS7b1</b> | C  | 8.417810  | 13.034587 | 14.496264 |  |
|              | C  | 7.183292  | 12.823695 | 15.165550 |  |
|              | H  | 6.260681  | 12.513135 | 14.692891 |  |
|              | C  | 7.319037  | 13.145080 | 16.543055 |  |
|              | C  | 8.679031  | 13.506066 | 16.735769 |  |
|              | H  | 9.109384  | 13.855238 | 17.664552 |  |
|              | C  | 9.354062  | 13.437009 | 15.488802 |  |
|              | H  | 10.387117 | 13.714918 | 15.314133 |  |

|   |           |           |           |
|---|-----------|-----------|-----------|
| C | 8.596623  | 13.102383 | 12.984737 |
| C | 10.075388 | 13.234020 | 12.598350 |
| H | 10.512493 | 14.153446 | 13.005142 |
| H | 10.176293 | 13.276577 | 11.507538 |
| H | 10.671863 | 12.386470 | 12.951828 |
| C | 7.984547  | 11.877769 | 12.289901 |
| H | 8.484271  | 10.952076 | 12.593232 |
| H | 8.077208  | 11.969158 | 11.200417 |
| H | 6.920220  | 11.774071 | 12.525983 |
| C | 7.857877  | 14.365026 | 12.488870 |
| H | 6.786411  | 14.309579 | 12.710851 |
| H | 7.976316  | 14.476199 | 11.403103 |
| H | 8.255556  | 15.266066 | 12.969896 |
| C | 6.201772  | 13.350177 | 17.560536 |
| C | 6.042084  | 14.871395 | 17.772691 |
| H | 6.960060  | 15.319282 | 18.170385 |
| H | 5.229923  | 15.073681 | 18.482846 |
| H | 5.802526  | 15.375457 | 16.829076 |
| C | 6.542235  | 12.698354 | 18.909494 |
| H | 6.650039  | 11.612204 | 18.798227 |
| H | 5.743880  | 12.890279 | 19.637838 |
| H | 7.471593  | 13.099923 | 19.330331 |
| C | 4.867688  | 12.788863 | 17.055557 |
| H | 4.543194  | 13.300381 | 16.141537 |
| H | 4.088355  | 12.942011 | 17.812082 |
| H | 4.939489  | 11.716382 | 16.847737 |
| C | 11.259494 | 11.290871 | 18.012846 |
| C | 11.410538 | 9.942440  | 17.591470 |
| H | 12.268004 | 9.556946  | 17.049936 |
| C | 10.383410 | 9.129823  | 18.147708 |
| C | 9.530175  | 10.010964 | 18.862701 |
| H | 8.650514  | 9.730601  | 19.429527 |
| C | 10.058985 | 11.328030 | 18.771495 |
| H | 9.651777  | 12.192291 | 19.280931 |
| C | 12.373888 | 12.335010 | 17.978632 |
| C | 11.877115 | 13.759438 | 18.257129 |
| H | 11.258036 | 14.144904 | 17.442723 |
| H | 12.734828 | 14.434331 | 18.365295 |
| H | 11.300678 | 13.814339 | 19.187513 |
| C | 13.133306 | 12.328912 | 16.643668 |
| H | 13.607049 | 11.359102 | 16.453656 |
| H | 13.930482 | 13.082228 | 16.658168 |
| H | 12.472172 | 12.557442 | 15.799992 |
| C | 13.367107 | 11.954257 | 19.101285 |
| H | 12.873922 | 11.970275 | 20.079760 |
| H | 14.206834 | 12.661148 | 19.129606 |
| H | 13.771754 | 10.948059 | 18.945747 |
| C | 10.434095 | 7.608654  | 18.259692 |
| C | 11.005734 | 6.952591  | 16.995244 |
| H | 10.364063 | 7.128209  | 16.127378 |
| H | 11.082768 | 5.868018  | 17.140198 |
| H | 12.010816 | 7.321725  | 16.759946 |
| C | 11.373945 | 7.280904  | 19.442398 |
| H | 12.385273 | 7.664691  | 19.263924 |
| H | 11.441301 | 6.194545  | 19.586089 |
| H | 11.003771 | 7.725640  | 20.373203 |
| C | 9.055345  | 7.007156  | 18.553408 |
| H | 8.644172  | 7.387577  | 19.495758 |
| H | 9.134800  | 5.916942  | 18.646708 |
| H | 8.343948  | 7.241970  | 17.755127 |
| C | 12.354001 | 10.110651 | 13.751805 |
| H | 12.387932 | 10.048043 | 14.834351 |

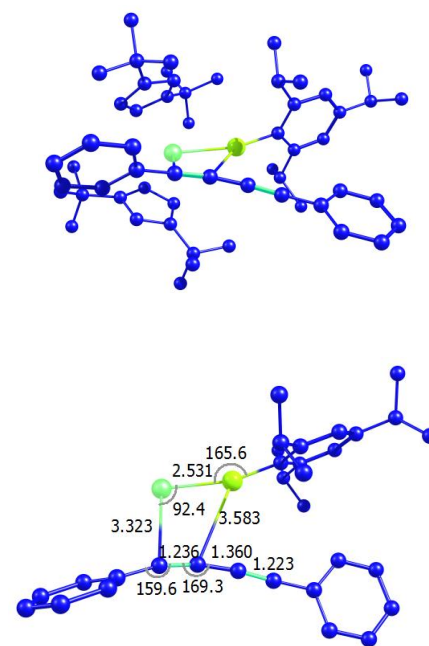

|   |           |           |           |
|---|-----------|-----------|-----------|
| C | 13.421844 | 10.652491 | 13.042890 |
| H | 14.291280 | 11.019908 | 13.581102 |
| C | 13.378541 | 10.722054 | 11.650241 |
| H | 14.212973 | 11.147113 | 11.099256 |
| C | 12.259902 | 10.241117 | 10.966635 |
| H | 12.221856 | 10.288391 | 9.881592  |
| C | 11.189017 | 9.696725  | 11.665670 |
| H | 10.320214 | 9.317718  | 11.136402 |
| C | 11.222986 | 9.625937  | 13.073842 |
| C | 10.126956 | 9.011652  | 13.760681 |
| C | 9.199276  | 8.229590  | 13.996361 |
| C | 8.328973  | 7.195899  | 14.149220 |
| C | 7.640129  | 6.186159  | 14.201478 |
| C | 6.799345  | 5.047820  | 14.303578 |
| C | 7.201735  | 3.814357  | 13.755374 |
| H | 8.161887  | 3.744068  | 13.252689 |
| C | 6.374617  | 2.701874  | 13.858658 |
| H | 6.691861  | 1.753960  | 13.432207 |
| C | 5.141959  | 2.801511  | 14.506898 |
| H | 4.497873  | 1.929585  | 14.585893 |
| C | 4.736988  | 4.020576  | 15.053435 |
| H | 3.778737  | 4.100739  | 15.559208 |
| C | 5.553716  | 5.141988  | 14.956414 |
| H | 5.243576  | 6.093333  | 15.378548 |
| C | 5.005375  | 8.852205  | 16.336783 |
| C | 4.166791  | 9.008184  | 15.193275 |
| C | 2.842694  | 8.566643  | 15.240926 |
| H | 2.222025  | 8.696546  | 14.355683 |
| C | 2.285137  | 7.977196  | 16.377246 |
| C | 3.115794  | 7.823445  | 17.486382 |
| H | 2.702151  | 7.367342  | 18.385359 |
| C | 4.451056  | 8.236482  | 17.494745 |
| C | 4.654857  | 9.642539  | 13.898613 |
| H | 5.678107  | 9.991607  | 14.085705 |
| C | 3.808595  | 10.857848 | 13.495881 |
| H | 2.778410  | 10.574061 | 13.247393 |
| H | 4.234050  | 11.344584 | 12.608901 |
| H | 3.762490  | 11.596621 | 14.303331 |
| C | 4.715688  | 8.620707  | 12.755245 |
| H | 5.368432  | 7.780020  | 13.011620 |
| H | 5.106081  | 9.087018  | 11.841582 |
| H | 3.721682  | 8.217224  | 12.524195 |
| C | 0.831512  | 7.541702  | 16.423194 |
| H | 0.670212  | 7.061409  | 17.398881 |
| C | 0.496595  | 6.508094  | 15.339474 |
| H | 0.616752  | 6.930438  | 14.334670 |
| H | -0.542628 | 6.169940  | 15.434590 |
| H | 1.148787  | 5.630616  | 15.412101 |
| C | -0.117509 | 8.746611  | 16.340634 |
| H | 0.088892  | 9.467450  | 17.139498 |
| H | -1.163057 | 8.426154  | 16.429115 |
| H | -0.007169 | 9.269623  | 15.382938 |
| C | 5.253336  | 8.022206  | 18.769359 |
| H | 6.278914  | 8.347670  | 18.555826 |
| C | 5.309801  | 6.543840  | 19.175608 |
| H | 4.316755  | 6.152771  | 19.430301 |
| H | 5.950335  | 6.413245  | 20.056616 |
| H | 5.716147  | 5.925936  | 18.367415 |
| C | 4.722087  | 8.887429  | 19.920586 |
| H | 4.718723  | 9.948297  | 19.647792 |
| H | 5.346132  | 8.766546  | 20.815410 |
| H | 3.695899  | 8.609055  | 20.191905 |

|           |    |           |           |           |  |
|-----------|----|-----------|-----------|-----------|--|
|           | P  | 6.749315  | 9.424038  | 16.322799 |  |
|           | Th | 8.882601  | 10.785513 | 16.279815 |  |
| <b>9b</b> | C  | 8.475341  | 13.326988 | 14.741894 |  |
|           | C  | 7.239947  | 13.224420 | 15.441604 |  |
|           | H  | 6.300829  | 12.907967 | 15.006225 |  |
|           | C  | 7.404876  | 13.670005 | 16.782919 |  |
|           | C  | 8.774408  | 14.000503 | 16.930866 |  |
|           | H  | 9.239934  | 14.393944 | 17.826516 |  |
|           | C  | 9.429745  | 13.783580 | 15.690389 |  |
|           | H  | 10.467326 | 14.015215 | 15.480918 |  |
|           | C  | 8.673152  | 13.264011 | 13.231946 |  |
|           | C  | 10.124875 | 12.927527 | 12.864027 |  |
|           | H  | 10.828580 | 13.663356 | 13.270284 |  |
|           | H  | 10.244817 | 12.930511 | 11.773950 |  |
|           | H  | 10.410391 | 11.933458 | 13.225003 |  |
|           | C  | 7.741440  | 12.237978 | 12.574246 |  |
|           | H  | 7.949025  | 11.225499 | 12.935495 |  |
|           | H  | 7.882530  | 12.246647 | 11.486524 |  |
|           | H  | 6.688216  | 12.466882 | 12.770784 |  |
|           | C  | 8.336095  | 14.664529 | 12.672641 |  |
|           | H  | 7.301060  | 14.941842 | 12.903461 |  |
|           | H  | 8.458866  | 14.681421 | 11.581958 |  |
|           | H  | 8.993782  | 15.429291 | 13.101876 |  |
|           | C  | 6.319600  | 13.915479 | 17.824028 |  |
|           | C  | 6.095603  | 15.439160 | 17.924900 |  |
|           | H  | 7.009908  | 15.954651 | 18.240195 |  |
|           | H  | 5.307948  | 15.663499 | 18.655807 |  |
|           | H  | 5.791722  | 15.854245 | 16.957235 |  |
|           | C  | 6.753999  | 13.394669 | 19.204432 |  |
|           | H  | 6.920561  | 12.309793 | 19.193754 |  |
|           | H  | 5.978436  | 13.599345 | 19.952819 |  |
|           | H  | 7.677078  | 13.876985 | 19.545625 |  |
|           | C  | 4.992822  | 13.253765 | 17.428017 |  |
|           | H  | 4.601621  | 13.674339 | 16.494311 |  |
|           | H  | 4.240450  | 13.427163 | 18.206794 |  |
|           | H  | 5.102406  | 12.171822 | 17.292639 |  |
|           | C  | 11.467638 | 11.519769 | 18.033423 |  |
|           | C  | 11.467598 | 10.157849 | 17.628058 |  |
|           | H  | 12.200486 | 9.707730  | 16.969472 |  |
|           | C  | 10.479486 | 9.431315  | 18.346632 |  |
|           | C  | 9.799606  | 10.382129 | 19.153587 |  |
|           | H  | 8.986749  | 10.172237 | 19.841329 |  |
|           | C  | 10.400364 | 11.657855 | 18.961463 |  |
|           | H  | 10.125909 | 12.562526 | 19.492355 |  |
|           | C  | 12.617514 | 12.491376 | 17.778232 |  |
|           | C  | 12.261121 | 13.937149 | 18.147425 |  |
|           | H  | 11.466538 | 14.340163 | 17.513500 |  |
|           | H  | 13.140889 | 14.580113 | 18.023985 |  |
|           | H  | 11.940751 | 14.018122 | 19.192528 |  |
|           | C  | 13.098646 | 12.439999 | 16.319739 |  |
|           | H  | 13.432943 | 11.434835 | 16.040308 |  |
|           | H  | 13.948352 | 13.118672 | 16.176101 |  |
|           | H  | 12.311311 | 12.738113 | 15.618961 |  |
|           | C  | 13.786197 | 12.046185 | 18.687517 |  |
|           | H  | 13.490995 | 12.069193 | 19.742694 |  |
|           | H  | 14.648512 | 12.713201 | 18.558432 |  |
|           | H  | 14.105367 | 11.025534 | 18.449478 |  |
|           | C  | 10.433989 | 7.912941  | 18.479059 |  |
|           | C  | 10.839526 | 7.205741  | 17.178224 |  |
|           | H  | 10.152498 | 7.443531  | 16.361210 |  |
|           | H  | 10.827980 | 6.119129  | 17.327503 |  |
|           | H  | 11.852400 | 7.480059  | 16.862629 |  |

|   |           |           |           |
|---|-----------|-----------|-----------|
| C | 11.453403 | 7.536905  | 19.578760 |
| H | 12.464756 | 7.861294  | 19.307754 |
| H | 11.471127 | 6.449024  | 19.724487 |
| H | 11.193373 | 8.005436  | 20.535010 |
| C | 9.050661  | 7.413113  | 18.907661 |
| H | 8.733312  | 7.861574  | 19.856537 |
| H | 9.072713  | 6.325842  | 19.048463 |
| H | 8.297032  | 7.646123  | 18.149752 |
| C | 11.363670 | 9.269270  | 13.890266 |
| H | 11.774696 | 9.738569  | 14.779594 |
| C | 12.215311 | 8.855017  | 12.870329 |
| H | 13.288767 | 8.997647  | 12.973306 |
| C | 11.694639 | 8.271678  | 11.714697 |
| H | 12.355539 | 7.957650  | 10.910648 |
| C | 10.313047 | 8.111392  | 11.597621 |
| H | 9.891015  | 7.675946  | 10.694413 |
| C | 9.464204  | 8.510616  | 12.626471 |
| H | 8.392026  | 8.389321  | 12.510149 |
| C | 9.967904  | 9.092533  | 13.809103 |
| C | 9.102776  | 9.591594  | 14.884474 |
| C | 7.919675  | 8.988092  | 15.270568 |
| C | 7.517952  | 7.699189  | 14.842821 |
| C | 7.184448  | 6.568050  | 14.526957 |
| C | 6.827343  | 5.250706  | 14.129193 |
| C | 7.706669  | 4.480773  | 13.342327 |
| H | 8.660021  | 4.908388  | 13.045803 |
| C | 7.356317  | 3.191819  | 12.954947 |
| H | 8.043775  | 2.607215  | 12.348842 |
| C | 6.129687  | 2.648992  | 13.342135 |
| H | 5.859743  | 1.640923  | 13.038151 |
| C | 5.251290  | 3.404306  | 14.121347 |
| H | 4.295375  | 2.984720  | 14.424549 |
| C | 5.592105  | 4.694189  | 14.514529 |
| H | 4.912201  | 5.287293  | 15.118992 |
| C | 5.072745  | 8.886028  | 16.320599 |
| C | 4.316784  | 9.073345  | 15.131321 |
| C | 3.057415  | 8.480177  | 15.026743 |
| H | 2.490803  | 8.626369  | 14.109294 |
| C | 2.492843  | 7.725549  | 16.057195 |
| C | 3.238516  | 7.573623  | 17.223151 |
| H | 2.811982  | 6.997465  | 18.042767 |
| C | 4.513440  | 8.129387  | 17.382204 |
| C | 4.787177  | 9.929573  | 13.965242 |
| H | 5.798294  | 10.279608 | 14.197081 |
| C | 3.895824  | 11.171292 | 13.811355 |
| H | 2.862758  | 10.895440 | 13.567212 |
| H | 4.265469  | 11.813743 | 13.002618 |
| H | 3.872350  | 11.759798 | 14.735080 |
| C | 4.856732  | 9.143114  | 12.649457 |
| H | 5.483239  | 8.252192  | 12.755280 |
| H | 5.280338  | 9.770245  | 11.855697 |
| H | 3.862406  | 8.820138  | 12.317361 |
| C | 1.113706  | 7.104366  | 15.926797 |
| H | 0.909026  | 6.574526  | 16.867661 |
| C | 1.057632  | 6.071129  | 14.792856 |
| H | 1.241258  | 6.539053  | 13.818360 |
| H | 0.070494  | 5.594909  | 14.753190 |
| H | 1.809321  | 5.286504  | 14.932781 |
| C | 0.024121  | 8.171660  | 15.751761 |
| H | 0.040636  | 8.894280  | 16.575033 |
| H | -0.969009 | 7.707310  | 15.723568 |
| H | 0.158663  | 8.726757  | 14.815702 |

|              |    |           |           |           |  |
|--------------|----|-----------|-----------|-----------|--|
|              | C  | 5.221035  | 7.892135  | 18.707496 |  |
|              | H  | 6.214284  | 8.347398  | 18.627916 |  |
|              | C  | 5.422142  | 6.397557  | 18.990487 |  |
|              | H  | 4.466723  | 5.873799  | 19.115799 |  |
|              | H  | 5.997737  | 6.259560  | 19.913618 |  |
|              | H  | 5.968125  | 5.912414  | 18.174245 |  |
|              | C  | 4.491055  | 8.584462  | 19.866829 |  |
|              | H  | 4.391047  | 9.660962  | 19.686671 |  |
|              | H  | 5.043148  | 8.445578  | 20.804614 |  |
|              | H  | 3.483341  | 8.175598  | 20.010817 |  |
|              | P  | 6.704542  | 9.698363  | 16.562890 |  |
|              | Th | 8.889298  | 11.216289 | 16.655007 |  |
| <b>TS7b2</b> | C  | 7.452992  | 11.331765 | 19.014816 |  |
|              | C  | 6.094774  | 11.048215 | 18.692952 |  |
|              | H  | 5.631570  | 11.234008 | 17.731379 |  |
|              | C  | 5.409292  | 10.584565 | 19.851792 |  |
|              | C  | 6.375175  | 10.508539 | 20.886094 |  |
|              | H  | 6.187743  | 10.213294 | 21.911852 |  |
|              | C  | 7.618910  | 10.959963 | 20.373833 |  |
|              | H  | 8.524966  | 11.084928 | 20.954460 |  |
|              | C  | 8.425588  | 12.180944 | 18.205676 |  |
|              | C  | 9.885538  | 11.878430 | 18.568080 |  |
|              | H  | 10.087248 | 12.053746 | 19.631349 |  |
|              | H  | 10.554846 | 12.534736 | 17.998847 |  |
|              | H  | 10.152502 | 10.844885 | 18.326505 |  |
|              | C  | 8.231503  | 11.997754 | 16.696399 |  |
|              | H  | 8.411123  | 10.961780 | 16.393035 |  |
|              | H  | 8.932148  | 12.638972 | 16.147864 |  |
|              | H  | 7.219571  | 12.278054 | 16.387229 |  |
|              | C  | 8.129397  | 13.655913 | 18.560532 |  |
|              | H  | 7.096426  | 13.922391 | 18.308977 |  |
|              | H  | 8.799433  | 14.323316 | 18.003504 |  |
|              | H  | 8.274801  | 13.841611 | 19.630978 |  |
|              | C  | 3.909076  | 10.407629 | 20.043888 |  |
|              | C  | 3.404280  | 11.588156 | 20.901075 |  |
|              | H  | 3.883565  | 11.599441 | 21.886503 |  |
|              | H  | 2.319495  | 11.514536 | 21.050796 |  |
|              | H  | 3.616974  | 12.545768 | 20.412400 |  |
|              | C  | 3.599648  | 9.096539  | 20.784884 |  |
|              | H  | 3.924628  | 8.224298  | 20.202591 |  |
|              | H  | 2.521160  | 8.996992  | 20.957201 |  |
|              | H  | 4.094406  | 9.059089  | 21.762380 |  |
|              | C  | 3.167826  | 10.426878 | 18.702811 |  |
|              | H  | 3.313269  | 11.379937 | 18.181038 |  |
|              | H  | 2.090345  | 10.305708 | 18.866776 |  |
|              | H  | 3.501223  | 9.621118  | 18.040251 |  |
|              | C  | 8.555960  | 7.451903  | 21.530635 |  |
|              | C  | 8.978527  | 6.580475  | 20.485549 |  |
|              | H  | 10.004544 | 6.459332  | 20.157279 |  |
|              | C  | 7.896709  | 5.756229  | 20.073005 |  |
|              | C  | 6.759616  | 6.196547  | 20.804429 |  |
|              | H  | 5.758499  | 5.785993  | 20.735278 |  |
|              | C  | 7.163543  | 7.225306  | 21.698094 |  |
|              | H  | 6.518894  | 7.712905  | 22.420171 |  |
|              | C  | 9.506178  | 8.165422  | 22.489942 |  |
|              | C  | 8.775633  | 9.151239  | 23.410850 |  |
|              | H  | 8.312714  | 9.971036  | 22.855290 |  |
|              | H  | 9.484748  | 9.591023  | 24.122226 |  |
|              | H  | 7.995642  | 8.650151  | 23.995463 |  |
|              | C  | 10.640439 | 8.890557  | 21.748859 |  |
|              | H  | 11.233656 | 8.195623  | 21.144237 |  |
|              | H  | 11.322139 | 9.361213  | 22.467658 |  |

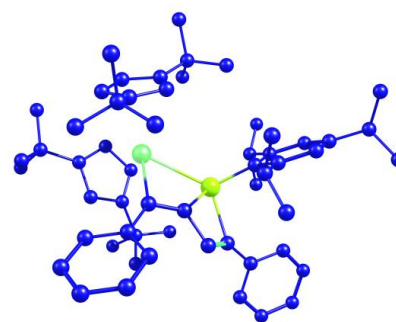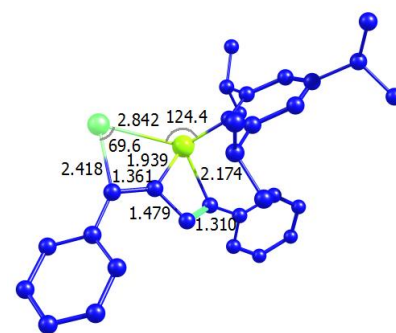

|   |           |           |           |
|---|-----------|-----------|-----------|
| H | 10.262971 | 9.675726  | 21.084729 |
| C | 10.137932 | 7.070189  | 23.380379 |
| H | 9.366314  | 6.519970  | 23.930703 |
| H | 10.823034 | 7.520593  | 24.109974 |
| H | 10.703441 | 6.349093  | 22.780259 |
| C | 8.052745  | 4.443921  | 19.311423 |
| C | 9.026084  | 4.571362  | 18.131307 |
| H | 8.648046  | 5.254943  | 17.366257 |
| H | 9.174271  | 3.589148  | 17.665522 |
| H | 10.010002 | 4.931538  | 18.452117 |
| C | 8.638089  | 3.427134  | 20.319411 |
| H | 9.621757  | 3.747592  | 20.680868 |
| H | 8.753575  | 2.445799  | 19.841694 |
| H | 7.979966  | 3.308715  | 21.188059 |
| C | 6.708161  | 3.900251  | 18.815022 |
| H | 6.013783  | 3.724370  | 19.645208 |
| H | 6.859565  | 2.942052  | 18.304290 |
| H | 6.235742  | 4.587235  | 18.106776 |
| C | 11.064204 | 8.454813  | 17.522968 |
| H | 10.898776 | 8.332910  | 18.591011 |
| C | 12.362381 | 8.573825  | 17.033787 |
| H | 13.204543 | 8.541015  | 17.721264 |
| C | 12.580478 | 8.749608  | 15.666828 |
| H | 13.591903 | 8.855445  | 15.282183 |
| C | 11.488430 | 8.795721  | 14.799062 |
| H | 11.648064 | 8.935130  | 13.732252 |
| C | 10.191439 | 8.657784  | 15.286679 |
| H | 9.349411  | 8.673857  | 14.602983 |
| C | 9.949634  | 8.479580  | 16.663747 |
| C | 8.594220  | 8.344415  | 17.217521 |
| C | 7.606054  | 7.695532  | 16.543670 |
| C | 7.662508  | 6.817819  | 15.354730 |
| C | 6.659137  | 5.979075  | 15.434611 |
| C | 6.098615  | 4.799394  | 14.807027 |
| C | 6.925978  | 3.680118  | 14.596383 |
| H | 7.953324  | 3.715822  | 14.945687 |
| C | 6.439838  | 2.555269  | 13.937041 |
| H | 7.093431  | 1.701488  | 13.775938 |
| C | 5.119509  | 2.521599  | 13.485556 |
| H | 4.739894  | 1.641083  | 12.973328 |
| C | 4.290724  | 3.625934  | 13.688931 |
| H | 3.265048  | 3.610330  | 13.328758 |
| C | 4.773176  | 4.758062  | 14.339807 |
| H | 4.132993  | 5.623737  | 14.477247 |
| C | 4.389897  | 7.859909  | 16.152382 |
| C | 4.419301  | 8.731757  | 15.031586 |
| C | 3.240454  | 8.950225  | 14.311077 |
| H | 3.285278  | 9.609298  | 13.447165 |
| C | 2.021894  | 8.363288  | 14.644318 |
| C | 2.000216  | 7.553911  | 15.777891 |
| H | 1.055080  | 7.105333  | 16.075222 |
| C | 3.137692  | 7.291285  | 16.545276 |
| C | 5.655481  | 9.478558  | 14.546190 |
| H | 6.464592  | 9.313359  | 15.263784 |
| C | 5.406886  | 10.993835 | 14.482717 |
| H | 4.669924  | 11.253236 | 13.713668 |
| H | 6.336204  | 11.517793 | 14.232622 |
| H | 5.036984  | 11.385359 | 15.436874 |
| C | 6.129614  | 8.968736  | 13.176786 |
| H | 6.378249  | 7.904985  | 13.213537 |
| H | 7.026535  | 9.514112  | 12.858495 |
| H | 5.358263  | 9.122682  | 12.411960 |

|    |           |           |           |
|----|-----------|-----------|-----------|
| C  | 0.764236  | 8.605499  | 13.829989 |
| H  | -0.037938 | 8.014677  | 14.294370 |
| C  | 0.917248  | 8.118886  | 12.382304 |
| H  | 1.696269  | 8.681264  | 11.853833 |
| H  | -0.020870 | 8.250855  | 11.829644 |
| H  | 1.189014  | 7.058165  | 12.346296 |
| C  | 0.333818  | 10.078959 | 13.871397 |
| H  | 0.191241  | 10.421963 | 14.902175 |
| H  | -0.609138 | 10.221856 | 13.329819 |
| H  | 1.086705  | 10.725540 | 13.404677 |
| C  | 2.963594  | 6.380166  | 17.761652 |
| H  | 3.808228  | 6.565435  | 18.437916 |
| C  | 2.996462  | 4.891171  | 17.387010 |
| H  | 2.181075  | 4.648399  | 16.694475 |
| H  | 2.872957  | 4.270526  | 18.283238 |
| H  | 3.937226  | 4.608301  | 16.906824 |
| C  | 1.685915  | 6.680920  | 18.559577 |
| H  | 1.577519  | 7.749569  | 18.768040 |
| H  | 1.714007  | 6.146221  | 19.516452 |
| H  | 0.784146  | 6.345523  | 18.034218 |
| P  | 5.827976  | 7.134972  | 17.077711 |
| Th | 7.202639  | 8.446055  | 19.192138 |



**Table S9.** Frequencies of the stationary points optimized for for  $2'+\text{Ph}_2\text{C}_4$ .

| Species      | Frequencies ( $\text{cm}^{-1}$ ) |      |      |      |      |      |      |      |      |      |      |     |
|--------------|----------------------------------|------|------|------|------|------|------|------|------|------|------|-----|
| <b>2'</b>    | 16                               | 18   | 20   | 30   | 35   | 36   | 42   | 46   | 51   | 58   | 63   | 66  |
|              | 78                               | 81   | 85   | 88   | 92   | 106  | 113  | 120  | 125  | 128  | 131  |     |
|              | 139                              | 147  | 155  | 173  | 181  | 194  | 200  | 205  | 213  | 222  | 229  |     |
|              | 237                              | 239  | 240  | 243  | 244  | 246  | 248  | 250  | 251  | 256  | 260  |     |
|              | 265                              | 266  | 267  | 272  | 281  | 290  | 291  | 294  | 297  | 316  | 322  |     |
|              | 323                              | 326  | 332  | 336  | 345  | 349  | 352  | 363  | 364  | 367  | 369  |     |
|              | 371                              | 379  | 385  | 389  | 406  | 411  | 423  | 438  | 447  | 448  | 450  |     |
|              | 458                              | 484  | 487  | 501  | 505  | 506  | 520  | 527  | 558  | 566  | 581  |     |
|              | 608                              | 617  | 621  | 645  | 649  | 654  | 670  | 674  | 690  | 691  | 770  |     |
|              | 775                              | 789  | 827  | 830  | 833  | 834  | 836  | 840  | 844  | 850  | 857  |     |
|              | 857                              | 900  | 902  | 911  | 934  | 935  | 936  | 937  | 942  | 944  | 947  |     |
|              | 947                              | 951  | 953  | 954  | 955  | 956  | 958  | 960  | 960  | 965  | 965  |     |
|              | 972                              | 972  | 973  | 974  | 977  | 980  | 1048 | 1051 | 1053 | 1053 | 1055 |     |
|              | 1056                             | 1062 | 1071 | 1075 | 1079 | 1083 | 1088 | 1100 | 1117 | 1122 | 1130 |     |
|              | 1139                             | 1141 | 1143 | 1165 | 1190 | 1201 | 1201 | 1206 | 1214 | 1218 | 1224 |     |
|              | 1233                             | 1241 | 1242 | 1244 | 1245 | 1248 | 1273 | 1274 | 1275 | 1287 | 1287 |     |
|              | 1289                             | 1296 | 1333 | 1344 | 1349 | 1357 | 1366 | 1368 | 1376 | 1396 | 1398 |     |
|              | 1402                             | 1403 | 1404 | 1413 | 1413 | 1414 | 1414 | 1415 | 1416 | 1417 | 1418 |     |
|              | 1421                             | 1425 | 1429 | 1432 | 1433 | 1434 | 1442 | 1445 | 1450 | 1453 | 1471 |     |
|              | 1475                             | 1476 | 1484 | 1501 | 1501 | 1503 | 1504 | 1506 | 1506 | 1507 | 1508 |     |
|              | 1508                             | 1510 | 1511 | 1511 | 1512 | 1512 | 1512 | 1514 | 1514 | 1515 | 1521 |     |
|              | 1522                             | 1523 | 1523 | 1524 | 1525 | 1525 | 1526 | 1528 | 1528 | 1530 | 1533 |     |
|              | 1536                             | 1539 | 1543 | 1546 | 1549 | 1555 | 1588 | 1604 | 1608 | 1660 | 3035 |     |
|              | 3039                             | 3041 | 3042 | 3043 | 3044 | 3045 | 3045 | 3046 | 3046 | 3046 | 3047 |     |
|              | 3050                             | 3050 | 3051 | 3052 | 3053 | 3054 | 3056 | 3057 | 3063 | 3106 | 3111 |     |
|              | 3111                             | 3112 | 3115 | 3116 | 3116 | 3117 | 3118 | 3119 | 3120 | 3120 | 3123 |     |
|              | 3123                             | 3124 | 3124 | 3125 | 3126 | 3127 | 3129 | 3130 | 3131 | 3131 | 3132 |     |
|              | 3132                             | 3133 | 3134 | 3134 | 3137 | 3138 | 3139 | 3139 | 3141 | 3145 | 3145 |     |
|              | 3159                             | 3170 | 3172 | 3222 | 3237 | 3245 | 3255 | 3264 | 3270 |      |      |     |
|              | <b>PhCCCCPh</b>                  | 13   | 27   | 34   | 82   | 95   | 190  | 213  | 232  | 312  | 406  | 406 |
| 463          |                                  | 473  | 512  | 518  | 557  | 620  | 631  | 649  | 675  | 702  | 702  |     |
| 754          |                                  | 772  | 783  | 796  | 855  | 855  | 933  | 933  | 976  | 976  | 1004 |     |
| 1004         |                                  | 1008 | 1014 | 1014 | 1059 | 1065 | 1113 | 1113 | 1193 | 1193 | 1209 |     |
| 1211         |                                  | 1243 | 1338 | 1338 | 1375 | 1375 | 1400 | 1488 | 1489 | 1536 | 1550 |     |
| 1634         |                                  | 1634 | 1666 | 1666 | 2249 | 2330 | 3201 | 3201 | 3210 | 3210 | 3220 |     |
| 3220         |                                  | 3228 | 3228 | 3232 | 3232 |      |      |      |      |      |      |     |
|              |                                  |      |      |      |      |      |      |      |      |      |      |     |
| <b>TS7a1</b> | -56                              | 12   | 13   | 20   | 21   | 27   | 29   | 31   | 32   | 36   | 42   |     |
|              | 47                               | 54   | 55   | 58   | 59   | 60   | 63   | 64   | 69   | 72   | 75   |     |
|              | 77                               | 86   | 88   | 89   | 94   | 96   | 105  | 113  | 123  | 126  | 129  |     |
|              | 131                              | 140  | 149  | 159  | 166  | 178  | 182  | 188  | 195  | 199  | 207  |     |
|              | 223                              | 227  | 228  | 230  | 234  | 234  | 240  | 242  | 244  | 248  | 248  |     |
|              | 250                              | 251  | 257  | 260  | 263  | 264  | 265  | 267  | 271  | 291  | 293  |     |
|              | 296                              | 299  | 300  | 305  | 318  | 318  | 319  | 324  | 326  | 336  | 338  |     |
|              | 347                              | 352  | 354  | 358  | 365  | 367  | 369  | 373  | 379  | 383  | 393  |     |
|              | 403                              | 407  | 407  | 409  | 429  | 430  | 436  | 448  | 449  | 455  | 458  |     |
|              | 473                              | 479  | 484  | 485  | 499  | 502  | 507  | 513  | 528  | 533  | 552  |     |
|              | 559                              | 561  | 581  | 598  | 606  | 613  | 621  | 630  | 633  | 645  | 647  |     |
|              | 655                              | 664  | 667  | 681  | 683  | 685  | 699  | 701  | 770  | 770  | 771  |     |
|              | 775                              | 786  | 794  | 830  | 830  | 831  | 834  | 836  | 841  | 851  | 854  |     |
|              | 856                              | 857  | 865  | 869  | 902  | 903  | 915  | 934  | 936  | 936  | 937  |     |
|              | 937                              | 939  | 941  | 942  | 946  | 948  | 948  | 954  | 955  | 957  | 958  |     |
|              | 959                              | 960  | 961  | 965  | 966  | 968  | 971  | 972  | 973  | 974  | 977  |     |
|              | 978                              | 980  | 1004 | 1006 | 1008 | 1014 | 1015 | 1050 | 1051 | 1052 | 1053 |     |
|              | 1054                             | 1055 | 1056 | 1058 | 1059 | 1065 | 1068 | 1084 | 1084 | 1087 | 1099 |     |
|              | 1113                             | 1114 | 1117 | 1122 | 1133 | 1138 | 1139 | 1142 | 1164 | 1191 | 1191 |     |
|              | 1192                             | 1199 | 1203 | 1206 | 1208 | 1212 | 1215 | 1218 | 1225 | 1233 | 1234 |     |
|              | 1238                             | 1242 | 1244 | 1245 | 1246 | 1273 | 1274 | 1275 | 1284 | 1287 | 1289 |     |
|              | 1297                             | 1336 | 1338 | 1340 | 1344 | 1347 | 1357 | 1368 | 1369 | 1374 | 1375 |     |
|              | 1375                             | 1389 | 1396 | 1397 | 1402 | 1403 | 1403 | 1412 | 1412 | 1413 | 1413 |     |

|              |      |      |      |      |      |      |      |      |      |      |      |      |
|--------------|------|------|------|------|------|------|------|------|------|------|------|------|
|              |      | 1414 | 1416 | 1416 | 1421 | 1421 | 1424 | 1424 | 1433 | 1434 | 1435 | 1446 |
|              |      | 1447 | 1448 | 1448 | 1470 | 1474 | 1479 | 1483 | 1487 | 1487 | 1499 | 1500 |
|              |      | 1502 | 1502 | 1504 | 1505 | 1505 | 1507 | 1507 | 1508 | 1510 | 1510 | 1511 |
|              |      | 1511 | 1512 | 1512 | 1512 | 1515 | 1521 | 1522 | 1522 | 1522 | 1523 | 1523 |
|              |      | 1525 | 1526 | 1526 | 1528 | 1529 | 1530 | 1530 | 1533 | 1535 | 1538 | 1543 |
|              |      | 1544 | 1545 | 1549 | 1553 | 1560 | 1603 | 1633 | 1633 | 1660 | 1661 | 1664 |
|              |      | 2189 | 2292 | 3040 | 3044 | 3044 | 3044 | 3044 | 3045 | 3046 | 3046 | 3047 |
|              |      | 3047 | 3047 | 3050 | 3051 | 3052 | 3053 | 3055 | 3057 | 3057 | 3061 | 3063 |
|              |      | 3065 | 3110 | 3113 | 3116 | 3117 | 3119 | 3119 | 3119 | 3120 | 3120 | 3120 |
|              |      | 3122 | 3123 | 3124 | 3124 | 3124 | 3125 | 3127 | 3129 | 3129 | 3131 | 3132 |
|              |      | 3132 | 3133 | 3133 | 3134 | 3136 | 3137 | 3138 | 3141 | 3142 | 3144 | 3146 |
|              |      | 3146 | 3147 | 3149 | 3159 | 3171 | 3177 | 3203 | 3204 | 3212 | 3213 | 3221 |
|              |      | 3221 | 3228 | 3229 | 3232 | 3233 | 3238 | 3247 | 3249 | 3264 | 3275 | 3278 |
| <b>9a</b>    | 7    | 11   | 13   | 18   | 22   | 27   | 30   | 33   | 36   | 38   | 44   | 49   |
|              |      | 50   | 53   | 56   | 58   | 60   | 62   | 70   | 72   | 74   | 79   | 84   |
|              |      | 87   | 91   | 94   | 101  | 104  | 110  | 121  | 128  | 130  | 137  | 143  |
|              |      | 147  | 150  | 173  | 177  | 182  | 188  | 192  | 199  | 203  | 209  | 227  |
|              |      | 229  | 232  | 234  | 235  | 240  | 246  | 249  | 250  | 253  | 254  | 258  |
|              |      | 259  | 260  | 262  | 264  | 273  | 274  | 291  | 295  | 295  | 299  | 310  |
|              |      | 315  | 317  | 319  | 320  | 326  | 327  | 329  | 333  | 340  | 344  | 351  |
|              |      | 352  | 355  | 365  | 366  | 368  | 369  | 381  | 388  | 391  | 409  | 413  |
|              |      | 417  | 421  | 429  | 431  | 444  | 448  | 448  | 466  | 474  | 481  | 489  |
|              |      | 491  | 498  | 500  | 513  | 522  | 526  | 543  | 552  | 560  | 580  | 584  |
|              |      | 591  | 612  | 617  | 619  | 620  | 631  | 632  | 648  | 653  | 660  | 663  |
|              |      | 677  | 685  | 694  | 705  | 707  | 721  | 760  | 770  | 772  | 780  | 784  |
|              |      | 790  | 830  | 831  | 834  | 837  | 841  | 845  | 853  | 853  | 855  | 858  |
|              |      | 860  | 862  | 901  | 903  | 904  | 914  | 921  | 935  | 936  | 936  | 937  |
|              |      | 939  | 940  | 943  | 947  | 950  | 950  | 954  | 956  | 958  | 958  | 961  |
|              |      | 961  | 962  | 965  | 966  | 966  | 971  | 971  | 971  | 974  | 975  | 975  |
|              |      | 980  | 994  | 995  | 1012 | 1013 | 1037 | 1048 | 1050 | 1051 | 1052 | 1054 |
|              |      | 1056 | 1057 | 1060 | 1061 | 1069 | 1083 | 1084 | 1085 | 1093 | 1095 | 1109 |
|              | 1114 | 1119 | 1122 | 1133 | 1137 | 1138 | 1140 | 1168 | 1187 | 1188 | 1188 | 1192 |
|              |      | 1201 | 1202 | 1205 | 1207 | 1209 | 1214 | 1215 | 1217 | 1226 | 1236 | 1239 |
|              |      | 1239 | 1243 | 1247 | 1251 | 1272 | 1274 | 1277 | 1283 | 1288 | 1290 | 1303 |
|              |      | 1308 | 1333 | 1340 | 1342 | 1344 | 1345 | 1356 | 1357 | 1358 | 1372 | 1374 |
|              |      | 1375 | 1390 | 1398 | 1399 | 1402 | 1404 | 1411 | 1415 | 1415 | 1416 | 1416 |
|              |      | 1417 | 1417 | 1417 | 1422 | 1423 | 1428 | 1436 | 1437 | 1437 | 1443 | 1447 |
|              |      | 1449 | 1454 | 1456 | 1472 | 1477 | 1485 | 1487 | 1487 | 1488 | 1500 | 1502 |
|              |      | 1503 | 1503 | 1505 | 1506 | 1506 | 1507 | 1508 | 1509 | 1510 | 1510 | 1510 |
|              |      | 1512 | 1512 | 1512 | 1513 | 1515 | 1522 | 1523 | 1523 | 1523 | 1524 | 1525 |
|              |      | 1526 | 1526 | 1527 | 1529 | 1530 | 1530 | 1531 | 1534 | 1536 | 1537 | 1543 |
|              |      | 1545 | 1547 | 1550 | 1555 | 1613 | 1629 | 1640 | 1662 | 1662 | 1665 | 1732 |
|              |      | 2239 | 3045 | 3045 | 3045 | 3046 | 3046 | 3048 | 3048 | 3050 | 3051 | 3051 |
|              |      | 3051 | 3051 | 3051 | 3054 | 3054 | 3054 | 3057 | 3057 | 3058 | 3058 | 3091 |
|              |      | 3114 | 3119 | 3120 | 3120 | 3121 | 3122 | 3123 | 3123 | 3123 | 3124 | 3125 |
|              |      | 3125 | 3125 | 3126 | 3128 | 3128 | 3128 | 3129 | 3129 | 3130 | 3133 | 3133 |
|              |      | 3134 | 3134 | 3135 | 3135 | 3136 | 3136 | 3138 | 3138 | 3138 | 3139 | 3145 |
|              |      | 3146 | 3149 | 3153 | 3188 | 3189 | 3192 | 3193 | 3200 | 3202 | 3214 | 3215 |
|              |      | 3222 | 3226 | 3227 | 3232 | 3234 | 3241 | 3252 | 3257 | 3263 | 3278 |      |
| <b>TS7a2</b> | -59  | 17   | 17   | 20   | 22   | 24   | 30   | 35   | 37   | 39   | 42   |      |
|              | 44   | 45   | 49   | 52   | 57   | 59   | 64   | 66   | 70   | 75   | 77   |      |
|              | 86   | 86   | 91   | 96   | 106  | 108  | 115  | 125  | 129  | 131  | 138  |      |
|              | 142  | 147  | 157  | 172  | 173  | 182  | 189  | 192  | 195  | 205  | 209  |      |
|              | 222  | 224  | 230  | 231  | 234  | 239  | 241  | 243  | 247  | 248  | 252  |      |
|              | 253  | 255  | 256  | 262  | 264  | 265  | 275  | 284  | 293  | 294  | 295  |      |
|              | 299  | 302  | 305  | 311  | 312  | 318  | 324  | 335  | 336  | 348  | 351  |      |
|              | 354  | 356  | 360  | 364  | 369  | 374  | 374  | 384  | 389  | 389  | 399  |      |
|              | 413  | 415  | 421  | 426  | 434  | 439  | 446  | 447  | 453  | 459  | 480  |      |
|              | 481  | 490  | 499  | 500  | 501  | 504  | 527  | 536  | 538  | 558  | 576  |      |
|              | 580  | 598  | 608  | 615  | 620  | 625  | 630  | 631  | 639  | 652  | 660  |      |
|              | 673  | 675  | 685  | 698  | 703  | 706  | 742  | 747  | 766  | 774  | 777  |      |
|              | 786  | 789  | 828  | 831  | 832  | 835  | 840  | 847  | 849  | 854  | 857  |      |

|              |      |      |      |      |      |      |      |      |      |      |      |
|--------------|------|------|------|------|------|------|------|------|------|------|------|
|              | 858  | 858  | 864  | 902  | 907  | 915  | 919  | 934  | 935  | 936  | 937  |
|              | 939  | 941  | 941  | 947  | 949  | 950  | 952  | 955  | 957  | 959  | 959  |
|              | 960  | 961  | 963  | 964  | 968  | 969  | 971  | 973  | 974  | 974  | 976  |
|              | 977  | 977  | 993  | 994  | 1000 | 1010 | 1015 | 1048 | 1050 | 1053 | 1054 |
|              | 1055 | 1058 | 1060 | 1060 | 1063 | 1063 | 1077 | 1081 | 1082 | 1087 | 1095 |
|              | 1110 | 1115 | 1117 | 1117 | 1131 | 1133 | 1139 | 1142 | 1166 | 1187 | 1188 |
|              | 1193 | 1199 | 1202 | 1204 | 1206 | 1208 | 1215 | 1215 | 1226 | 1229 | 1236 |
|              | 1237 | 1240 | 1242 | 1246 | 1249 | 1272 | 1274 | 1275 | 1283 | 1286 | 1287 |
|              | 1297 | 1306 | 1332 | 1334 | 1340 | 1343 | 1346 | 1357 | 1357 | 1359 | 1370 |
|              | 1372 | 1379 | 1390 | 1397 | 1398 | 1399 | 1399 | 1413 | 1413 | 1414 | 1416 |
|              | 1417 | 1417 | 1418 | 1420 | 1423 | 1426 | 1427 | 1434 | 1435 | 1436 | 1446 |
|              | 1446 | 1448 | 1455 | 1469 | 1476 | 1478 | 1484 | 1487 | 1489 | 1500 | 1502 |
|              | 1502 | 1502 | 1505 | 1506 | 1507 | 1507 | 1507 | 1508 | 1509 | 1510 | 1510 |
|              | 1511 | 1511 | 1512 | 1512 | 1513 | 1520 | 1522 | 1522 | 1523 | 1523 | 1523 |
|              | 1525 | 1525 | 1525 | 1526 | 1528 | 1529 | 1529 | 1531 | 1534 | 1534 | 1538 |
|              | 1541 | 1543 | 1549 | 1551 | 1598 | 1609 | 1625 | 1640 | 1660 | 1661 | 1663 |
|              | 1666 | 2132 | 3041 | 3042 | 3046 | 3046 | 3046 | 3048 | 3049 | 3049 | 3049 |
|              | 3050 | 3053 | 3053 | 3053 | 3054 | 3055 | 3059 | 3061 | 3061 | 3063 | 3070 |
|              | 3092 | 3117 | 3117 | 3118 | 3121 | 3122 | 3122 | 3122 | 3124 | 3124 | 3125 |
|              | 3126 | 3126 | 3127 | 3127 | 3128 | 3129 | 3130 | 3130 | 3132 | 3132 | 3132 |
|              | 3132 | 3133 | 3133 | 3133 | 3135 | 3135 | 3136 | 3139 | 3142 | 3145 | 3148 |
|              | 3150 | 3151 | 3162 | 3163 | 3180 | 3183 | 3193 | 3194 | 3201 | 3203 | 3215 |
|              | 3215 | 3221 | 3223 | 3226 | 3229 | 3239 | 3240 | 3246 | 3258 | 3273 | 3274 |
| <b>7</b>     | 1618 | 20   | 27   | 28   | 32   | 34   | 35   | 36   | 39   | 44   | 49   |
|              | 50   | 55   | 59   | 62   | 67   | 69   | 71   | 76   | 85   | 87   | 93   |
|              | 101  | 105  | 106  | 116  | 127  | 128  | 130  | 133  | 141  | 143  | 146  |
|              | 155  | 172  | 176  | 185  | 188  | 195  | 196  | 200  | 203  | 214  | 222  |
|              | 228  | 232  | 235  | 238  | 240  | 242  | 244  | 246  | 247  | 249  | 252  |
|              | 254  | 262  | 265  | 269  | 272  | 275  | 281  | 296  | 297  | 302  | 303  |
|              | 305  | 310  | 311  | 317  | 325  | 333  | 337  | 340  | 345  | 352  | 353  |
|              | 356  | 357  | 360  | 366  | 372  | 373  | 388  | 391  | 396  | 410  | 413  |
|              | 420  | 420  | 423  | 440  | 445  | 446  | 448  | 460  | 470  | 473  | 480  |
|              | 488  | 495  | 496  | 500  | 504  | 513  | 527  | 548  | 560  | 564  | 580  |
|              | 593  | 605  | 613  | 619  | 628  | 629  | 638  | 639  | 651  | 660  | 667  |
|              | 671  | 683  | 687  | 691  | 705  | 707  | 772  | 773  | 777  | 781  | 789  |
|              | 829  | 831  | 831  | 832  | 834  | 837  | 844  | 849  | 853  | 856  | 857  |
|              | 859  | 859  | 903  | 907  | 919  | 924  | 931  | 934  | 935  | 936  | 938  |
|              | 940  | 941  | 942  | 948  | 948  | 950  | 952  | 953  | 956  | 957  | 959  |
|              | 960  | 962  | 963  | 967  | 969  | 969  | 972  | 973  | 974  | 975  | 976  |
|              | 976  | 995  | 1000 | 1013 | 1014 | 1024 | 1047 | 1049 | 1051 | 1053 | 1054 |
|              | 1058 | 1059 | 1059 | 1060 | 1064 | 1072 | 1083 | 1084 | 1086 | 1097 | 1109 |
|              | 1113 | 1114 | 1119 | 1130 | 1133 | 1139 | 1141 | 1166 | 1186 | 1189 | 1193 |
|              | 1199 | 1202 | 1203 | 1205 | 1207 | 1214 | 1214 | 1227 | 1231 | 1235 | 1238 |
|              | 1238 | 1241 | 1247 | 1249 | 1272 | 1273 | 1277 | 1284 | 1284 | 1287 | 1300 |
|              | 1312 | 1333 | 1335 | 1337 | 1346 | 1346 | 1351 | 1358 | 1358 | 1372 | 1375 |
|              | 1380 | 1392 | 1396 | 1399 | 1400 | 1404 | 1412 | 1413 | 1414 | 1415 | 1416 |
|              | 1417 | 1417 | 1422 | 1423 | 1425 | 1427 | 1435 | 1436 | 1437 | 1446 | 1447 |
|              | 1448 | 1455 | 1470 | 1477 | 1479 | 1483 | 1488 | 1491 | 1501 | 1502 | 1502 |
|              | 1503 | 1505 | 1506 | 1506 | 1507 | 1508 | 1508 | 1509 | 1510 | 1511 | 1511 |
|              | 1512 | 1512 | 1512 | 1513 | 1522 | 1523 | 1523 | 1523 | 1524 | 1525 | 1525 |
|              | 1526 | 1527 | 1527 | 1528 | 1530 | 1530 | 1532 | 1532 | 1534 | 1538 | 1541 |
|              | 1544 | 1550 | 1552 | 1606 | 1607 | 1611 | 1631 | 1641 | 1658 | 1662 | 1664 |
|              | 2029 | 3043 | 3043 | 3046 | 3047 | 3047 | 3049 | 3049 | 3050 | 3051 | 3051 |
|              | 3053 | 3054 | 3056 | 3056 | 3057 | 3057 | 3062 | 3064 | 3064 | 3065 | 3085 |
|              | 3117 | 3118 | 3119 | 3121 | 3122 | 3122 | 3124 | 3124 | 3124 | 3125 | 3126 |
|              | 3126 | 3127 | 3128 | 3129 | 3129 | 3131 | 3132 | 3132 | 3133 | 3133 | 3133 |
|              | 3134 | 3134 | 3135 | 3135 | 3140 | 3140 | 3142 | 3147 | 3151 | 3153 | 3155 |
|              | 3162 | 3164 | 3165 | 3180 | 3186 | 3190 | 3194 | 3197 | 3202 | 3208 | 3211 |
|              | 3217 | 3221 | 3225 | 3232 | 3244 | 3249 | 3253 | 3265 | 3269 | 3280 |      |
| <b>TS7b1</b> | -42  | 14   | 20   | 21   | 24   | 29   | 30   | 31   | 35   | 37   | 43   |
|              | 44   | 47   | 50   | 51   | 56   | 59   | 61   | 67   | 71   | 73   | 75   |
|              | 78   | 83   | 86   | 90   | 92   | 94   | 101  | 110  | 112  | 124  | 129  |

|           |      |      |      |      |      |      |      |      |      |      |      |    |
|-----------|------|------|------|------|------|------|------|------|------|------|------|----|
|           | 132  | 144  | 152  | 163  | 171  | 178  | 183  | 186  | 194  | 196  | 204  |    |
|           | 212  | 214  | 225  | 226  | 231  | 234  | 238  | 239  | 242  | 246  | 247  |    |
|           | 248  | 251  | 256  | 260  | 262  | 264  | 264  | 267  | 271  | 286  | 289  |    |
|           | 297  | 297  | 298  | 305  | 307  | 316  | 316  | 317  | 324  | 327  | 337  |    |
|           | 342  | 348  | 351  | 356  | 363  | 364  | 365  | 366  | 368  | 380  | 391  |    |
|           | 393  | 404  | 407  | 409  | 424  | 427  | 437  | 443  | 449  | 451  | 457  |    |
|           | 474  | 478  | 487  | 489  | 501  | 503  | 509  | 516  | 528  | 532  | 543  |    |
|           | 557  | 561  | 582  | 604  | 615  | 617  | 621  | 631  | 633  | 646  | 648  |    |
|           | 654  | 667  | 668  | 680  | 682  | 687  | 701  | 702  | 763  | 769  | 769  |    |
|           | 774  | 786  | 788  | 823  | 828  | 829  | 830  | 834  | 834  | 840  | 848  |    |
|           | 855  | 857  | 859  | 863  | 901  | 903  | 916  | 932  | 934  | 935  | 936  |    |
|           | 936  | 937  | 938  | 940  | 946  | 948  | 950  | 954  | 956  | 957  | 958  |    |
|           | 959  | 961  | 963  | 964  | 965  | 966  | 971  | 972  | 973  | 974  | 976  |    |
|           | 979  | 981  | 1006 | 1006 | 1009 | 1013 | 1016 | 1047 | 1051 | 1051 | 1052 |    |
|           | 1053 | 1054 | 1056 | 1058 | 1059 | 1063 | 1064 | 1083 | 1089 | 1091 | 1102 |    |
|           | 1109 | 1113 | 1116 | 1123 | 1131 | 1139 | 1140 | 1142 | 1163 | 1190 | 1191 |    |
|           | 1192 | 1200 | 1202 | 1206 | 1206 | 1209 | 1215 | 1220 | 1224 | 1233 | 1233 |    |
|           | 1236 | 1238 | 1243 | 1245 | 1246 | 1272 | 1274 | 1274 | 1286 | 1287 | 1289 |    |
|           | 1295 | 1336 | 1337 | 1338 | 1343 | 1351 | 1358 | 1361 | 1370 | 1372 | 1373 |    |
|           | 1376 | 1388 | 1398 | 1398 | 1403 | 1405 | 1406 | 1411 | 1413 | 1413 | 1414 |    |
|           | 1414 | 1415 | 1416 | 1419 | 1420 | 1424 | 1424 | 1433 | 1434 | 1435 | 1444 |    |
|           | 1446 | 1447 | 1449 | 1470 | 1472 | 1477 | 1484 | 1488 | 1488 | 1498 | 1498 |    |
|           | 1502 | 1503 | 1504 | 1504 | 1506 | 1506 | 1507 | 1507 | 1507 | 1509 | 1511 |    |
|           | 1511 | 1511 | 1511 | 1512 | 1512 | 1520 | 1521 | 1521 | 1522 | 1522 | 1523 |    |
|           | 1523 | 1524 | 1527 | 1527 | 1528 | 1529 | 1530 | 1531 | 1533 | 1535 | 1536 |    |
|           | 1542 | 1544 | 1546 | 1551 | 1554 | 1600 | 1633 | 1634 | 1658 | 1662 | 1665 |    |
|           | 2181 | 2297 | 3041 | 3043 | 3043 | 3043 | 3044 | 3045 | 3045 | 3046 | 3046 |    |
|           | 3046 | 3048 | 3051 | 3052 | 3053 | 3053 | 3056 | 3056 | 3059 | 3060 | 3061 |    |
|           | 3062 | 3111 | 3112 | 3115 | 3117 | 3117 | 3118 | 3119 | 3119 | 3121 | 3121 |    |
|           | 3121 | 3123 | 3123 | 3124 | 3125 | 3127 | 3127 | 3128 | 3131 | 3131 | 3131 |    |
|           | 3132 | 3132 | 3133 | 3134 | 3134 | 3135 | 3136 | 3138 | 3139 | 3142 | 3147 |    |
|           | 3152 | 3154 | 3160 | 3162 | 3168 | 3177 | 3201 | 3205 | 3211 | 3213 | 3220 |    |
|           | 3225 | 3227 | 3231 | 3233 | 3234 | 3240 | 3248 | 3252 | 3267 | 3272 | 3276 |    |
| <b>9b</b> | 11   | 15   | 18   | 19   | 27   | 29   | 30   | 33   | 36   | 37   | 41   | 44 |
|           | 49   | 51   | 57   | 60   | 63   | 68   | 71   | 75   | 82   | 84   | 88   |    |
|           | 89   | 91   | 95   | 97   | 104  | 110  | 122  | 130  | 130  | 136  | 140  |    |
|           | 146  | 146  | 162  | 176  | 179  | 185  | 191  | 201  | 203  | 214  | 223  |    |
|           | 228  | 230  | 231  | 233  | 234  | 239  | 240  | 246  | 247  | 248  | 252  |    |
|           | 254  | 257  | 259  | 263  | 265  | 271  | 278  | 285  | 289  | 291  | 296  |    |
|           | 297  | 298  | 300  | 302  | 319  | 327  | 337  | 339  | 342  | 345  | 351  |    |
|           | 356  | 362  | 366  | 367  | 368  | 377  | 380  | 384  | 390  | 409  | 412  |    |
|           | 415  | 416  | 421  | 433  | 436  | 437  | 449  | 449  | 453  | 481  | 482  |    |
|           | 487  | 503  | 503  | 505  | 509  | 521  | 528  | 547  | 558  | 559  | 581  |    |
|           | 590  | 607  | 615  | 622  | 624  | 630  | 632  | 652  | 656  | 663  | 666  |    |
|           | 671  | 684  | 686  | 700  | 705  | 709  | 761  | 763  | 773  | 774  | 777  |    |
|           | 783  | 817  | 826  | 828  | 832  | 832  | 833  | 836  | 843  | 844  | 857  |    |
|           | 860  | 861  | 880  | 903  | 905  | 919  | 926  | 934  | 935  | 936  | 938  |    |
|           | 939  | 940  | 941  | 943  | 946  | 948  | 953  | 954  | 957  | 957  | 959  |    |
|           | 960  | 961  | 965  | 965  | 968  | 970  | 970  | 973  | 973  | 974  | 976  |    |
|           | 979  | 991  | 1002 | 1013 | 1014 | 1034 | 1048 | 1051 | 1052 | 1052 | 1052 |    |
|           | 1053 | 1054 | 1060 | 1062 | 1064 | 1067 | 1079 | 1083 | 1088 | 1098 | 1110 |    |
|           | 1111 | 1115 | 1122 | 1132 | 1137 | 1138 | 1142 | 1168 | 1185 | 1190 | 1192 |    |
|           | 1201 | 1202 | 1205 | 1206 | 1209 | 1212 | 1217 | 1219 | 1226 | 1233 | 1239 |    |
|           | 1239 | 1241 | 1244 | 1245 | 1273 | 1273 | 1279 | 1287 | 1289 | 1290 | 1302 |    |
|           | 1324 | 1335 | 1336 | 1339 | 1345 | 1349 | 1353 | 1358 | 1367 | 1372 | 1372 |    |
|           | 1375 | 1394 | 1398 | 1400 | 1403 | 1406 | 1412 | 1413 | 1414 | 1414 | 1415 |    |
|           | 1415 | 1418 | 1419 | 1420 | 1423 | 1425 | 1434 | 1435 | 1438 | 1443 | 1445 |    |
|           | 1447 | 1447 | 1462 | 1473 | 1477 | 1478 | 1486 | 1486 | 1489 | 1501 | 1501 |    |
|           | 1502 | 1502 | 1505 | 1506 | 1506 | 1507 | 1508 | 1508 | 1510 | 1510 | 1510 |    |
|           | 1511 | 1511 | 1512 | 1513 | 1514 | 1521 | 1521 | 1522 | 1522 | 1523 | 1523 |    |
|           | 1523 | 1524 | 1527 | 1528 | 1529 | 1530 | 1531 | 1535 | 1536 | 1537 | 1540 |    |
|           | 1542 | 1546 | 1550 | 1552 | 1571 | 1611 | 1631 | 1634 | 1659 | 1661 | 1667 |    |

|              |      |      |      |      |      |      |      |      |      |      |      |
|--------------|------|------|------|------|------|------|------|------|------|------|------|
|              | 2282 | 3044 | 3044 | 3045 | 3046 | 3046 | 3047 | 3049 | 3049 | 3051 | 3051 |
|              | 3052 | 3054 | 3054 | 3054 | 3054 | 3056 | 3058 | 3061 | 3063 | 3078 | 3091 |
|              | 3118 | 3119 | 3119 | 3120 | 3120 | 3122 | 3122 | 3122 | 3123 | 3124 | 3125 |
|              | 3125 | 3126 | 3126 | 3127 | 3128 | 3128 | 3129 | 3129 | 3129 | 3132 | 3132 |
|              | 3133 | 3135 | 3135 | 3135 | 3137 | 3137 | 3138 | 3139 | 3141 | 3147 | 3147 |
|              | 3153 | 3160 | 3162 | 3180 | 3188 | 3189 | 3195 | 3197 | 3206 | 3213 | 3217 |
|              | 3223 | 3226 | 3229 | 3230 | 3232 | 3245 | 3250 | 3252 | 3260 | 3266 |      |
| <b>TS7b2</b> | -347 | 16   | 21   | 23   | 27   | 29   | 31   | 33   | 36   | 40   | 47   |
|              | 49   | 55   | 58   | 63   | 67   | 73   | 75   | 77   | 78   | 83   | 87   |
|              | 90   | 92   | 97   | 99   | 103  | 108  | 121  | 128  | 133  | 136  | 141  |
|              | 144  | 147  | 153  | 168  | 175  | 181  | 187  | 189  | 194  | 201  | 203  |
|              | 208  | 227  | 229  | 232  | 236  | 236  | 242  | 244  | 248  | 254  | 254  |
|              | 255  | 256  | 261  | 263  | 268  | 270  | 272  | 281  | 283  | 289  | 292  |
|              | 296  | 300  | 302  | 303  | 310  | 319  | 325  | 329  | 338  | 339  | 343  |
|              | 348  | 350  | 355  | 362  | 364  | 367  | 368  | 372  | 382  | 389  | 392  |
|              | 393  | 412  | 416  | 420  | 425  | 427  | 433  | 447  | 447  | 451  | 474  |
|              | 481  | 483  | 493  | 503  | 508  | 522  | 528  | 551  | 557  | 559  | 560  |
|              | 579  | 588  | 604  | 605  | 614  | 616  | 628  | 631  | 643  | 645  | 652  |
|              | 670  | 674  | 686  | 688  | 703  | 706  | 728  | 763  | 773  | 775  | 783  |
|              | 787  | 793  | 828  | 829  | 831  | 834  | 836  | 838  | 843  | 849  | 853  |
|              | 858  | 858  | 864  | 877  | 900  | 905  | 915  | 921  | 934  | 935  | 936  |
|              | 937  | 938  | 942  | 942  | 945  | 947  | 949  | 952  | 954  | 956  | 958  |
|              | 959  | 960  | 962  | 963  | 964  | 964  | 970  | 970  | 972  | 974  | 976  |
|              | 978  | 980  | 991  | 1000 | 1008 | 1013 | 1014 | 1043 | 1049 | 1050 | 1051 |
|              | 1052 | 1056 | 1057 | 1058 | 1060 | 1062 | 1063 | 1080 | 1083 | 1090 | 1100 |
|              | 1111 | 1111 | 1118 | 1121 | 1132 | 1134 | 1139 | 1144 | 1165 | 1186 | 1189 |
|              | 1191 | 1200 | 1201 | 1203 | 1205 | 1209 | 1214 | 1215 | 1217 | 1227 | 1233 |
|              | 1234 | 1240 | 1242 | 1245 | 1245 | 1250 | 1273 | 1275 | 1275 | 1283 | 1286 |
|              | 1289 | 1304 | 1333 | 1337 | 1338 | 1344 | 1345 | 1347 | 1355 | 1368 | 1372 |
|              | 1373 | 1373 | 1398 | 1399 | 1404 | 1406 | 1408 | 1413 | 1413 | 1414 | 1414 |
|              | 1416 | 1417 | 1418 | 1420 | 1422 | 1424 | 1425 | 1435 | 1435 | 1438 | 1447 |
|              | 1447 | 1448 | 1449 | 1465 | 1476 | 1477 | 1485 | 1486 | 1488 | 1499 | 1501 |
|              | 1502 | 1503 | 1503 | 1504 | 1504 | 1506 | 1507 | 1508 | 1508 | 1509 | 1510 |
|              | 1510 | 1511 | 1512 | 1515 | 1515 | 1516 | 1521 | 1522 | 1523 | 1524 | 1525 |
|              | 1525 | 1527 | 1527 | 1528 | 1529 | 1529 | 1530 | 1531 | 1532 | 1534 | 1536 |
|              | 1540 | 1542 | 1543 | 1546 | 1549 | 1553 | 1606 | 1634 | 1635 | 1660 | 1660 |
|              | 1661 | 1730 | 3042 | 3045 | 3045 | 3046 | 3048 | 3048 | 3049 | 3050 | 3051 |
|              | 3053 | 3054 | 3055 | 3055 | 3056 | 3057 | 3058 | 3059 | 3060 | 3063 | 3065 |
|              | 3100 | 3119 | 3119 | 3120 | 3121 | 3122 | 3122 | 3123 | 3123 | 3123 | 3124 |
|              | 3124 | 3125 | 3127 | 3127 | 3127 | 3128 | 3131 | 3131 | 3133 | 3133 | 3133 |
|              | 3135 | 3135 | 3135 | 3136 | 3138 | 3141 | 3146 | 3148 | 3149 | 3151 | 3156 |
|              | 3158 | 3160 | 3162 | 3169 | 3187 | 3194 | 3195 | 3195 | 3196 | 3205 | 3205 |
|              | 3217 | 3218 | 3231 | 3233 | 3237 | 3244 | 3246 | 3247 | 3259 | 3259 | 3262 |

**Table S10.** The energies (with ZPE correction), enthalpies and free energies (in au at 298K) and corresponding relative values (in kcal/mol) for **2'**+Ph<sub>2</sub>C<sub>4</sub>, obtained with B3PW91-PCM method

| Species           | E                   | H                   | G                   |
|-------------------|---------------------|---------------------|---------------------|
| <b>2'</b>         | -2349.159052        | -2349.106058        | -2349.222640        |
| <b>PhCCCCPh</b>   | -615.165353         | -615.151483         | -615.191730         |
| <b>2+PhCCCCPh</b> | -2964.324405(0.0)   | -2964.257541(0.0)   | -2964.414370(0.0)   |
| <b>TS7a1</b>      | -2964.306480(11.2)  | -2964.238809(11.7)  | -2964.383680(19.2)  |
| <b>9a</b>         | -2964.375125(-31.8) | -2964.307630(-31.4) | -2964.452850(-24.1) |
| <b>TS7a2</b>      | -2964.364772(-25.3) | -2964.298020(-25.4) | -2964.440780(-16.6) |
| <b>7</b>          | -2964.386801(-39.2) | -2964.319768(-39.0) | -2964.462670(-30.3) |
| <b>TS7b1</b>      | -2964.300259(15.2)  | -2964.232342(15.8)  | -2964.377410(23.2)  |
| <b>9b</b>         | -2964.367938(-27.3) | -2964.300096(-26.7) | -2964.445560(-19.6) |
| <b>TS7b2</b>      | -2964.291409(20.7)  | -2964.224718(20.6)  | -2964.366730(29.9)  |

<sup>a</sup> : The relative energies in parentheses are with respect to the corresponding energies of **2'**+ PhCCCCPh.
